# Supplementary material for: The Molecular Properties of Peanut Protein: Impact of Temperature, Relative Humidity and Vacuum Packaging during Storage
Source: MDPI journal article supplement (doi:10.3390/molecules23102618), 2018-10-12
Supplement: s1 [file s1]

**Table.1. Changes in PPI free SH**

|               | <b>-20 °C</b> |       |       | <b>4 °C</b> |       |       | <b>37 °C</b> |       |       | <b>37 °C AP</b> |       |       |
|---------------|---------------|-------|-------|-------------|-------|-------|--------------|-------|-------|-----------------|-------|-------|
| <b>0 wks</b>  | 16.12         | 15.83 | 15.94 | 16.12       | 15.83 | 15.94 | 16.12        | 15.83 | 15.94 | 16.12           | 15.83 | 15.94 |
| <b>2 wks</b>  | 14.91         | 14.61 | 14.75 | 14.54       | 14.03 | 14.21 | 14.03        | 13.94 | 13.91 | 12.97           | 12.22 | 12.52 |
| <b>4 wks</b>  | 14.36         | 13.9  | 14.19 | 14.26       | 13.77 | 13.94 | 13.94        | 13.49 | 13.66 | 11.48           | 10.99 | 11.16 |
| <b>6 wks</b>  | 13.76         | 13.26 | 13.59 | 13.33       | 12.46 | 12.83 | 11.99        | 11.22 | 11.53 | 10.67           | 10.26 | 10.39 |
| <b>8 wks</b>  | 11.88         | 11.66 | 11.74 | 9.35        | 8.95  | 9.08  | 8.94         | 8.53  | 8.68  | 8.48            | 8.20  | 8.27  |
| <b>10 wks</b> | 10.77         | 10.33 | 10.51 | 8.26        | 7.72  | 7.92  | 6.42         | 6.07  | 6.17  | 5.94            | 5.25  | 5.52  |

  

|               | <b>4 °C 33%RH</b> |       |       | <b>37 °C 33%RH</b> |       |       | <b>4 °C 74%RH</b> |       |       | <b>37 °C 74%RH</b> |       |       |
|---------------|-------------------|-------|-------|--------------------|-------|-------|-------------------|-------|-------|--------------------|-------|-------|
| <b>0 wks</b>  | 15.04             | 14.75 | 14.82 | 15.04              | 14.75 | 14.82 | 14.38             | 14.17 | 14.2  | 14.38              | 14.17 | 14.20 |
| <b>2 wks</b>  | 14.30             | 13.73 | 13.94 | 13.49              | 13.08 | 13.21 | 12.97             | 12.76 | 12.79 | 11.33              | 11.00 | 11.09 |
| <b>4 wks</b>  | 11.43             | 11.34 | 11.31 | 10.84              | 9.73  | 10.21 | 10.25             | 9.82  | 9.96  | 9.30               | 8.73  | 8.94  |
| <b>6 wks</b>  | 10.39             | 10.04 | 10.14 | 9.74               | 9.33  | 9.46  | 9.14              | 8.8   | 8.89  | 8.52               | 8.51  | 8.44  |
| <b>8 wks</b>  | 8.20              | 7.97  | 8.01  | 7.59               | 7.48  | 7.46  | 6.96              | 6.67  | 6.74  | 6.05               | 5.60  | 5.75  |
| <b>10 wks</b> | 6.29              | 5.88  | 6.01  | 5.95               | 5.58  | 5.69  | 5.18              | 4.85  | 4.94  | 4.53               | 4.08  | 4.23  |

**Table.2. Changes in PPI fluorescence intensity**

|              | <b>0 wks</b> | <b>6wks<br/>-20°C</b> | <b>6wks 4°C</b> | <b>6wks<br/>37°C</b> | <b>6wks<br/>37°C AP</b> | <b>10wks<br/>-20°C</b> | <b>10wks<br/>4°C</b> | <b>10wks<br/>37°C</b> | <b>10wks<br/>37°C AP</b> |
|--------------|--------------|-----------------------|-----------------|----------------------|-------------------------|------------------------|----------------------|-----------------------|--------------------------|
| <b>300</b>   | 750.46428    | 540.10074             | 576.07591       | 669.94795            | 450.91739               | 664.54595              | 581.03197            | 619.87156             | 657.55421                |
| <b>300.5</b> | 719.57177    | 519.11099             | 553.43942       | 642.72994            | 433.91181               | 637.79142              | 557.99224            | 598.81152             | 631.21392                |
| <b>301</b>   | 689.60068    | 498.81093             | 531.51928       | 616.3372             | 417.494                 | 611.83165              | 535.66905            | 578.30502             | 605.64425                |
| <b>301.5</b> | 660.551      | 479.20055             | 510.3155        | 590.76974            | 401.66396               | 586.66665              | 514.06238            | 558.35205             | 580.84521                |
| <b>302</b>   | 632.42273    | 460.27987             | 489.82807       | 566.02756            | 386.42169               | 562.2964               | 493.17225            | 538.95263             | 556.81678                |
| <b>302.5</b> | 605.21586    | 442.04887             | 470.057         | 542.11066            | 371.7672                | 538.72092              | 472.99865            | 520.10674             | 533.55898                |
| <b>303</b>   | 578.93041    | 424.50757             | 451.00228       | 519.01904            | 357.70047               | 515.94021              | 453.54158            | 501.81438             | 511.0718                 |
| <b>303.5</b> | 553.56637    | 407.65595             | 432.66392       | 496.75269            | 344.22152               | 493.95425              | 434.80104            | 484.07557             | 489.35525                |
| <b>304</b>   | 529.12374    | 391.49402             | 415.04192       | 475.31163            | 331.33033               | 472.76306              | 416.77703            | 466.89029             | 468.40931                |
| <b>304.5</b> | 505.60252    | 376.02178             | 398.13626       | 454.69584            | 319.02692               | 452.36663              | 399.46955            | 450.25854             | 448.234                  |
| <b>305</b>   | 483.00271    | 361.23923             | 381.94697       | 434.90533            | 307.31128               | 432.76496              | 382.87861            | 434.18034             | 428.82931                |
| <b>305.5</b> | 461.32431    | 347.14637             | 366.47403       | 415.9401             | 296.18341               | 413.95806              | 367.00419            | 418.65567             | 410.19524                |

|              |           |           |           |           |           |           |           |           |           |
|--------------|-----------|-----------|-----------|-----------|-----------|-----------|-----------|-----------|-----------|
| <b>306</b>   | 440.56732 | 333.7432  | 351.71744 | 397.80014 | 285.64332 | 395.94592 | 351.8463  | 403.68454 | 392.33179 |
| <b>306.5</b> | 420.73174 | 321.02971 | 337.67721 | 380.48547 | 275.69099 | 378.72854 | 337.40495 | 389.26694 | 375.23897 |
| <b>307</b>   | 401.81757 | 309.00592 | 324.35333 | 363.99607 | 266.32644 | 362.30592 | 323.68013 | 375.40288 | 358.91677 |
| <b>307.5</b> | 383.82482 | 297.67182 | 311.74581 | 348.33196 | 257.54965 | 346.67807 | 310.67183 | 362.09236 | 343.36519 |
| <b>308</b>   | 366.75347 | 287.0274  | 299.85465 | 333.49312 | 249.36064 | 331.84497 | 298.38007 | 349.33537 | 328.58423 |
| <b>308.5</b> | 350.60353 | 277.07267 | 288.67984 | 319.47955 | 241.7594  | 317.80665 | 286.80484 | 337.13193 | 314.5739  |
| <b>309</b>   | 335.375   | 267.80764 | 278.22138 | 306.29127 | 234.74593 | 304.56308 | 275.94614 | 325.48201 | 301.33418 |
| <b>309.5</b> | 321.06789 | 259.23229 | 268.47928 | 293.92827 | 228.32023 | 292.11428 | 265.80397 | 314.38564 | 288.86509 |
| <b>310</b>   | 307.68218 | 251.34663 | 259.45353 | 282.39054 | 222.48231 | 280.46023 | 256.37833 | 303.8428  | 277.16663 |
| <b>310.5</b> | 295.21789 | 244.15066 | 251.14414 | 271.67809 | 217.23215 | 269.60096 | 247.66922 | 293.8535  | 266.23878 |
| <b>311</b>   | 283.675   | 237.64438 | 243.55111 | 261.79092 | 212.56977 | 259.53644 | 239.67665 | 284.41773 | 256.08156 |
| <b>311.5</b> | 273.05353 | 231.82779 | 236.67443 | 252.72903 | 208.49515 | 250.26669 | 232.4006  | 275.53551 | 246.69495 |
| <b>312</b>   | 263.35346 | 226.70089 | 230.5141  | 244.49242 | 205.00831 | 241.7917  | 225.84109 | 267.20682 | 238.07897 |
| <b>312.5</b> | 254.57481 | 222.26368 | 225.07013 | 237.08108 | 202.10924 | 234.11147 | 219.9981  | 259.43166 | 230.23362 |
| <b>313</b>   | 228.57587 | 205.03431 | 205.97484 | 214.15245 | 188.30237 | 210.87355 | 200.38292 | 236.26467 | 206.91339 |
| <b>313.5</b> | 205.38991 | 189.766   | 188.94176 | 193.70164 | 176.06875 | 190.02642 | 182.85614 | 212.20668 | 185.91898 |
| <b>314</b>   | 185.34632 | 176.72916 | 174.2631  | 176.06133 | 165.66363 | 171.89714 | 167.71142 | 190.56239 | 167.57687 |
| <b>314.5</b> | 168.74253 | 166.15415 | 162.19091 | 161.51745 | 157.30701 | 156.76902 | 155.21686 | 171.66204 | 152.17923 |
| <b>315</b>   | 155.85026 | 158.23913 | 152.947   | 150.31251 | 151.19496 | 144.8936  | 145.60894 | 155.80357 | 139.98563 |
| <b>315.5</b> | 146.88594 | 153.154   | 146.72769 | 142.63158 | 147.49643 | 136.48857 | 139.07207 | 143.25374 | 131.20564 |
| <b>316</b>   | 142.19331 | 151.24482 | 143.92609 | 138.85312 | 146.56581 | 131.97415 | 135.97279 | 134.22714 | 126.23353 |
| <b>316.5</b> | 141.85651 | 152.5806  | 144.63255 | 139.06265 | 148.44075 | 131.44875 | 136.3789  | 129.1298  | 125.2007  |
| <b>317</b>   | 145.75779 | 157.07798 | 148.75063 | 143.11073 | 153.05673 | 134.7643  | 140.17504 | 128.06949 | 128.00526 |
| <b>317.5</b> | 153.5965  | 164.56801 | 156.06547 | 150.67565 | 160.28606 | 141.61039 | 147.12946 | 130.91794 | 134.35911 |
| <b>318</b>   | 164.77431 | 174.71699 | 166.14037 | 161.17788 | 169.8627  | 151.45963 | 156.83243 | 137.38068 | 143.71523 |
| <b>318.5</b> | 178.57271 | 187.10121 | 178.45865 | 174.02101 | 181.39704 | 163.73877 | 168.81364 | 146.89794 | 155.49653 |
| <b>319</b>   | 194.15052 | 201.13669 | 192.37245 | 188.50518 | 194.39379 | 177.7223  | 182.44948 | 158.8764  | 168.99763 |
| <b>319.5</b> | 210.79152 | 216.24815 | 207.29642 | 204.01059 | 208.36799 | 192.73697 | 197.1301  | 172.59135 | 183.57348 |
| <b>320</b>   | 227.86009 | 231.88433 | 222.68211 | 219.91313 | 222.88135 | 208.1478  | 212.25834 | 187.38856 | 198.57492 |
| <b>320.5</b> | 244.92156 | 247.6482  | 238.16335 | 235.7924  | 237.58754 | 223.5442  | 227.41761 | 202.6119  | 213.56319 |

|       |           |           |           |           |           |           |           |           |           |
|-------|-----------|-----------|-----------|-----------|-----------|-----------|-----------|-----------|-----------|
| 321   | 261.67049 | 263.26031 | 253.49783 | 251.38561 | 252.2302  | 238.67726 | 242.33505 | 217.82545 | 228.25403 |
| 321.5 | 277.99213 | 278.57885 | 268.58502 | 266.62799 | 266.64523 | 253.45451 | 256.88754 | 232.74328 | 242.55768 |
| 322   | 293.83876 | 293.53184 | 283.35828 | 281.48008 | 280.75243 | 267.82212 | 271.01276 | 247.26777 | 256.41233 |
| 322.5 | 309.21638 | 308.11396 | 297.78485 | 295.93417 | 294.53568 | 281.76858 | 284.71367 | 261.32278 | 269.80162 |
| 323   | 324.11297 | 322.33417 | 311.82322 | 309.97718 | 308.00766 | 295.29952 | 298.03321 | 274.89509 | 282.71594 |
| 323.5 | 338.57758 | 336.23178 | 325.48706 | 323.68111 | 321.19485 | 308.47789 | 311.05677 | 287.98235 | 295.24047 |
| 324   | 352.66612 | 349.8264  | 338.79389 | 337.09465 | 334.12818 | 321.35588 | 323.828   | 300.67145 | 307.43084 |
| 324.5 | 366.47796 | 363.17022 | 351.80569 | 350.27231 | 346.85514 | 333.99402 | 336.37256 | 313.01031 | 319.34519 |
| 325   | 380.06832 | 376.30384 | 364.57125 | 363.20394 | 359.42191 | 346.41752 | 348.68849 | 325.0485  | 330.9822  |
| 325.5 | 393.50958 | 389.28291 | 377.17838 | 375.93201 | 371.86145 | 358.68414 | 360.81626 | 336.78655 | 342.40577 |
| 326   | 406.82839 | 402.12609 | 389.69456 | 388.49834 | 384.18597 | 370.83764 | 372.79011 | 348.2982  | 353.6691  |
| 326.5 | 420.04861 | 414.85444 | 402.17224 | 400.95881 | 396.40079 | 382.92362 | 384.65031 | 359.65235 | 364.83711 |
| 327   | 433.15442 | 427.46529 | 414.60575 | 413.31454 | 408.50827 | 394.93972 | 396.39786 | 370.90817 | 375.91269 |
| 327.5 | 446.12667 | 439.94749 | 426.95381 | 425.53732 | 420.49466 | 406.86553 | 408.01825 | 382.0648  | 386.87881 |
| 328   | 458.9386  | 452.27607 | 439.16611 | 437.60044 | 432.33284 | 418.6726  | 419.49312 | 393.10125 | 397.71155 |
| 328.5 | 471.5589  | 464.42339 | 451.19733 | 449.48476 | 443.98713 | 430.32887 | 430.8074  | 403.99926 | 408.39268 |
| 329   | 483.95511 | 476.36636 | 463.01446 | 461.17098 | 455.43071 | 441.80741 | 441.94963 | 414.74026 | 418.90486 |
| 329.5 | 496.09322 | 488.09749 | 474.59184 | 472.62344 | 466.64674 | 453.08057 | 452.90027 | 425.31349 | 429.22037 |
| 330   | 507.9382  | 499.60539 | 485.91367 | 483.80807 | 477.61885 | 464.1186  | 463.63559 | 435.69877 | 439.30451 |
| 330.5 | 519.46422 | 510.8651  | 496.96936 | 494.70908 | 488.32501 | 474.88814 | 474.13074 | 445.8742  | 449.12921 |
| 331   | 530.66151 | 521.83734 | 507.75579 | 505.32827 | 498.74717 | 485.36904 | 484.37313 | 455.80939 | 458.67994 |
| 331.5 | 541.52802 | 532.49413 | 518.2653  | 515.67077 | 508.88067 | 495.55688 | 494.35175 | 465.48617 | 467.95084 |
| 332   | 552.07151 | 542.82465 | 528.48927 | 525.73469 | 518.7317  | 505.45744 | 504.06095 | 474.88894 | 476.93652 |
| 332.5 | 562.30467 | 552.832   | 538.41711 | 535.51137 | 528.30956 | 515.06522 | 513.47789 | 484.01212 | 485.6395  |
| 333   | 572.25215 | 562.52317 | 548.04522 | 545.0057  | 537.6166  | 524.37232 | 522.58438 | 492.83855 | 494.07106 |
| 333.5 | 581.93645 | 571.90902 | 557.37271 | 554.21892 | 546.64239 | 533.37247 | 531.37503 | 501.36299 | 502.23759 |
| 334   | 591.37501 | 581.00267 | 566.40735 | 563.13939 | 555.37205 | 542.07782 | 539.87703 | 509.58855 | 510.13532 |
| 334.5 | 600.56312 | 589.81592 | 575.165   | 571.74438 | 563.79705 | 550.49949 | 548.11531 | 517.53807 | 517.75411 |
| 335   | 609.48485 | 598.36217 | 583.6737  | 580.04169 | 571.91799 | 558.64998 | 556.10722 | 525.22793 | 525.10011 |
| 335.5 | 618.1163  | 606.6497  | 591.95135 | 588.05225 | 579.73584 | 566.5323  | 563.85117 | 532.67209 | 532.18914 |

|              |           |           |           |           |           |           |           |           |           |
|--------------|-----------|-----------|-----------|-----------|-----------|-----------|-----------|-----------|-----------|
| <b>336</b>   | 626.45376 | 614.68186 | 599.99975 | 595.79459 | 587.2507  | 574.1619  | 571.35736 | 539.87622 | 539.04865 |
| <b>336.5</b> | 634.50354 | 622.45394 | 607.80683 | 603.27388 | 594.47371 | 581.55144 | 578.63846 | 546.85918 | 545.69607 |
| <b>337</b>   | 642.28372 | 629.95883 | 615.3699  | 610.52329 | 601.43552 | 588.71122 | 585.71156 | 553.64092 | 552.14014 |
| <b>337.5</b> | 649.79833 | 637.18445 | 622.68379 | 617.57509 | 608.17561 | 595.62965 | 592.56316 | 560.23342 | 558.37415 |
| <b>338</b>   | 657.04681 | 644.12264 | 629.73399 | 624.43216 | 614.7181  | 602.29377 | 599.16933 | 566.61619 | 564.38558 |
| <b>338.5</b> | 664.02027 | 650.76326 | 636.4964  | 631.0478  | 621.06192 | 608.69356 | 605.50331 | 572.7583  | 570.15702 |
| <b>339</b>   | 670.73147 | 657.09909 | 642.9624  | 637.37948 | 627.19187 | 614.8421  | 611.56533 | 578.63128 | 575.67507 |
| <b>339.5</b> | 677.18664 | 663.11942 | 649.13826 | 643.39955 | 633.09393 | 620.75317 | 617.35215 | 584.22497 | 580.93854 |
| <b>340</b>   | 683.38101 | 668.82944 | 655.03811 | 649.10365 | 638.75572 | 626.43115 | 622.86016 | 589.52887 | 585.95301 |
| <b>340.5</b> | 689.27834 | 674.24336 | 660.66653 | 654.47467 | 644.15928 | 631.85685 | 628.07611 | 594.53436 | 590.71935 |
| <b>341</b>   | 694.84555 | 679.37357 | 666.01738 | 659.50226 | 649.27611 | 637.01156 | 632.99956 | 599.23504 | 595.23196 |
| <b>341.5</b> | 700.05709 | 684.21385 | 671.07271 | 664.1908  | 654.07275 | 641.88156 | 637.63651 | 603.63374 | 599.47855 |
| <b>342</b>   | 704.89284 | 688.74897 | 675.80886 | 668.57291 | 658.52178 | 646.45364 | 641.99815 | 607.73814 | 603.44525 |
| <b>342.5</b> | 709.32822 | 692.96302 | 680.19658 | 672.66312 | 662.6043  | 650.70198 | 646.07766 | 611.54571 | 607.11432 |
| <b>343</b>   | 713.35496 | 696.84056 | 684.2123  | 676.44213 | 666.30634 | 654.59707 | 649.84919 | 615.04011 | 610.47577 |
| <b>343.5</b> | 716.99257 | 700.36943 | 687.849   | 679.87377 | 669.61763 | 658.11898 | 653.27791 | 618.20687 | 613.53096 |
| <b>344</b>   | 720.27754 | 703.53837 | 691.10924 | 682.94494 | 672.52989 | 661.25876 | 656.33997 | 621.0426  | 616.28187 |
| <b>344.5</b> | 723.22865 | 706.33625 | 693.98611 | 685.65346 | 675.04555 | 664.01695 | 659.01636 | 623.53906 | 618.72136 |
| <b>345</b>   | 725.83744 | 708.74922 | 696.46891 | 687.99693 | 677.17975 | 666.38792 | 661.28897 | 625.67625 | 620.82557 |
| <b>345.5</b> | 728.07469 | 710.7667  | 698.56122 | 689.97029 | 678.95802 | 668.36614 | 663.14212 | 627.43946 | 622.57678 |
| <b>346</b>   | 729.90793 | 712.38022 | 700.27553 | 691.57579 | 680.39765 | 669.9544  | 664.58134 | 628.83648 | 623.96327 |
| <b>346.5</b> | 731.31861 | 713.58768 | 701.61347 | 692.81121 | 681.49726 | 671.17375 | 665.6328  | 629.88845 | 624.98753 |
| <b>347</b>   | 732.31522 | 714.39069 | 702.56594 | 693.66754 | 682.25097 | 672.05239 | 666.33127 | 630.61636 | 625.65394 |
| <b>347.5</b> | 732.9343  | 714.80003 | 703.13175 | 694.15085 | 682.66372 | 672.62037 | 666.70089 | 631.03103 | 625.98381 |
| <b>348</b>   | 733.21545 | 714.824   | 703.32816 | 694.2764  | 682.74713 | 672.90651 | 666.75769 | 631.146   | 626.00658 |
| <b>348.5</b> | 733.18084 | 714.48335 | 703.18186 | 694.05834 | 682.50702 | 672.9289  | 666.5139  | 630.9772  | 625.74936 |
| <b>349</b>   | 732.8238  | 713.80162 | 702.71369 | 693.4964  | 681.95082 | 672.69094 | 665.98004 | 630.53597 | 625.21966 |
| <b>349.5</b> | 732.13305 | 712.81    | 701.93695 | 692.59295 | 681.09027 | 672.18592 | 665.15457 | 629.81832 | 624.41884 |
| <b>350</b>   | 731.10206 | 711.51606 | 700.86136 | 691.35657 | 679.93991 | 671.40522 | 664.0292  | 628.81389 | 623.35449 |
| <b>350.5</b> | 729.73521 | 709.9305  | 699.50039 | 689.81506 | 678.51305 | 670.34068 | 662.60605 | 627.52541 | 622.0479  |

|              |           |           |           |           |           |           |           |           |           |
|--------------|-----------|-----------|-----------|-----------|-----------|-----------|-----------|-----------|-----------|
| <b>351</b>   | 728.03064 | 708.06642 | 697.85906 | 687.99534 | 676.83144 | 668.98982 | 660.91283 | 625.96757 | 620.5132  |
| <b>351.5</b> | 725.99679 | 705.96081 | 695.93428 | 685.91382 | 674.92215 | 667.35783 | 658.98832 | 624.16227 | 618.7597  |
| <b>352</b>   | 723.65957 | 703.63876 | 693.72432 | 683.57526 | 672.80431 | 665.46287 | 656.86299 | 622.12546 | 616.79193 |
| <b>352.5</b> | 721.06148 | 701.12211 | 691.24655 | 681.00939 | 670.48    | 663.32632 | 654.55164 | 619.88123 | 614.63132 |
| <b>353</b>   | 718.23661 | 698.42294 | 688.53925 | 678.27041 | 667.94609 | 660.97734 | 652.07109 | 617.4527  | 612.30752 |
| <b>353.5</b> | 715.21083 | 695.5715  | 685.65034 | 675.41084 | 665.21039 | 658.44258 | 649.44631 | 614.87198 | 609.84888 |
| <b>354</b>   | 712.00825 | 692.59112 | 682.62967 | 672.44882 | 662.30047 | 655.75311 | 646.6992  | 612.163   | 607.27019 |
| <b>354.5</b> | 708.66395 | 689.49918 | 679.51745 | 669.3961  | 659.24439 | 652.92832 | 643.83569 | 609.34848 | 604.58328 |
| <b>355</b>   | 705.21509 | 686.28634 | 676.34518 | 666.27415 | 656.0677  | 649.99035 | 640.85995 | 606.43463 | 601.8085  |
| <b>355.5</b> | 701.70146 | 682.95494 | 673.13326 | 663.11324 | 652.79818 | 646.95955 | 637.79153 | 603.42917 | 598.97147 |
| <b>356</b>   | 698.15715 | 679.52083 | 669.89118 | 659.91695 | 649.47788 | 643.86568 | 634.66291 | 600.33168 | 596.09065 |
| <b>356.5</b> | 694.60088 | 676.02502 | 666.6159  | 656.67013 | 646.14583 | 640.72537 | 631.49504 | 597.15716 | 593.17505 |
| <b>357</b>   | 691.03878 | 672.4971  | 663.30525 | 653.35944 | 642.8199  | 637.54123 | 628.29083 | 593.91848 | 590.22919 |
| <b>357.5</b> | 687.46506 | 668.96467 | 659.96355 | 649.99753 | 639.49522 | 634.31055 | 625.04777 | 590.6383  | 587.25801 |
| <b>358</b>   | 683.86997 | 665.44446 | 656.60596 | 646.59946 | 636.15728 | 631.04967 | 621.78112 | 587.33245 | 584.2604  |
| <b>358.5</b> | 680.2377  | 661.94887 | 653.25326 | 643.15316 | 632.79354 | 627.78464 | 618.51321 | 584.02332 | 581.2369  |
| <b>359</b>   | 676.55802 | 658.4653  | 649.92063 | 639.63489 | 629.3982  | 624.53191 | 615.25716 | 580.71346 | 578.19124 |
| <b>359.5</b> | 672.82744 | 654.97289 | 646.60915 | 636.04896 | 625.97244 | 621.2783  | 612.00653 | 577.40426 | 575.13599 |
| <b>360</b>   | 669.05775 | 651.45457 | 643.30244 | 632.42411 | 622.51697 | 618.00601 | 608.75318 | 574.09519 | 572.0828  |
| <b>360.5</b> | 665.26735 | 647.90442 | 639.97793 | 628.7731  | 619.03088 | 614.70557 | 605.49144 | 570.79186 | 569.03621 |
| <b>361</b>   | 661.48426 | 644.31649 | 636.61671 | 625.09211 | 615.5209  | 611.38745 | 602.21508 | 567.48266 | 565.98717 |
| <b>361.5</b> | 657.72319 | 640.68765 | 633.2137  | 621.38952 | 612.00625 | 608.04493 | 598.90587 | 564.15092 | 562.91801 |
| <b>362</b>   | 653.98514 | 637.01729 | 629.76873 | 617.69049 | 608.50499 | 604.65744 | 595.54508 | 560.78188 | 559.81166 |
| <b>362.5</b> | 650.24922 | 633.3064  | 626.28061 | 613.98535 | 605.01885 | 601.20892 | 592.11494 | 557.37496 | 556.65528 |
| <b>363</b>   | 646.49224 | 629.55312 | 622.75258 | 610.22421 | 601.53431 | 597.7128  | 588.61047 | 553.9305  | 553.4338  |
| <b>363.5</b> | 642.68773 | 625.74668 | 619.197   | 606.35495 | 598.03446 | 594.18865 | 585.0354  | 550.44622 | 550.14056 |
| <b>364</b>   | 638.81719 | 621.87285 | 615.62175 | 602.37315 | 594.49574 | 590.63795 | 581.40741 | 546.91618 | 546.78059 |
| <b>364.5</b> | 634.84689 | 617.9214  | 612.00703 | 598.30022 | 590.88957 | 587.03703 | 577.73794 | 543.33945 | 543.37165 |
| <b>365</b>   | 630.74543 | 613.89641 | 608.31666 | 594.15352 | 587.18207 | 583.35929 | 574.0258  | 539.72335 | 539.91725 |
| <b>365.5</b> | 626.48553 | 609.79783 | 604.51867 | 589.92147 | 583.34847 | 579.5921  | 570.25417 | 536.07318 | 536.41024 |

|              |           |           |           |           |           |           |           |           |           |
|--------------|-----------|-----------|-----------|-----------|-----------|-----------|-----------|-----------|-----------|
| <b>366</b>   | 622.06856 | 605.62106 | 600.60254 | 585.59691 | 579.36857 | 575.73383 | 566.41065 | 532.37973 | 532.83732 |
| <b>366.5</b> | 617.50814 | 601.35506 | 596.56374 | 581.18599 | 575.22765 | 571.77024 | 562.48809 | 528.62249 | 529.19711 |
| <b>367</b>   | 612.83049 | 596.99043 | 592.39372 | 576.69357 | 570.92041 | 567.67516 | 558.47572 | 524.78753 | 525.49206 |
| <b>367.5</b> | 608.05847 | 592.5083  | 588.08613 | 572.08429 | 566.46816 | 563.43221 | 554.34756 | 520.86642 | 521.71879 |
| <b>368</b>   | 603.21179 | 587.89174 | 583.64966 | 567.31235 | 561.91251 | 559.055   | 550.07808 | 516.85673 | 517.86278 |
| <b>368.5</b> | 598.28847 | 583.13076 | 579.09893 | 562.36605 | 557.28645 | 554.57209 | 545.66181 | 512.75809 | 513.90323 |
| <b>369</b>   | 593.26875 | 578.22465 | 574.43699 | 557.28145 | 552.5938  | 549.99978 | 541.10579 | 508.57236 | 509.82407 |
| <b>369.5</b> | 588.1208  | 573.17168 | 569.64863 | 552.09661 | 547.82364 | 545.33751 | 536.4086  | 504.29593 | 505.61701 |
| <b>370</b>   | 582.82562 | 567.97506 | 564.728   | 546.82846 | 542.96615 | 540.57673 | 531.56485 | 499.92795 | 501.28528 |
| <b>370.5</b> | 577.38498 | 562.64332 | 559.68048 | 541.46807 | 538.00811 | 535.71737 | 526.58368 | 495.47314 | 496.84202 |
| <b>371</b>   | 571.82301 | 557.19337 | 554.51875 | 536.01    | 532.92624 | 530.76602 | 521.49617 | 490.94109 | 492.30803 |
| <b>371.5</b> | 566.17362 | 551.6426  | 549.24663 | 530.46209 | 527.71255 | 525.73213 | 516.33279 | 486.33319 | 487.70802 |
| <b>372</b>   | 560.47253 | 546.00579 | 543.86933 | 524.84371 | 522.39705 | 520.6237  | 511.11374 | 481.64562 | 483.06223 |
| <b>372.5</b> | 554.73459 | 540.29227 | 538.39596 | 519.16244 | 517.0313  | 515.44979 | 505.8537  | 476.8776  | 478.382   |
| <b>373</b>   | 548.94878 | 534.51171 | 532.84427 | 513.41018 | 511.64898 | 510.22158 | 500.57181 | 472.04322 | 473.67191 |
| <b>373.5</b> | 543.09449 | 528.68736 | 527.22974 | 507.58775 | 506.25774 | 504.94485 | 495.28572 | 467.15985 | 468.92857 |
| <b>374</b>   | 537.1646  | 522.84685 | 521.56433 | 501.71945 | 500.85852 | 499.62228 | 489.99647 | 462.23508 | 464.15143 |
| <b>374.5</b> | 531.17004 | 517.01617 | 515.86307 | 495.8427  | 495.45554 | 494.2587  | 484.68684 | 457.26426 | 459.34564 |
| <b>375</b>   | 525.11993 | 511.20526 | 510.14661 | 489.98017 | 490.04867 | 488.85974 | 479.34194 | 452.24588 | 454.53048 |
| <b>375.5</b> | 519.02709 | 505.41951 | 504.43459 | 484.14012 | 484.63242 | 483.43572 | 473.96945 | 447.19789 | 449.72099 |
| <b>376</b>   | 512.9147  | 499.65507 | 498.73806 | 478.32439 | 479.21299 | 478.0059  | 468.59015 | 442.15456 | 444.92596 |
| <b>376.5</b> | 506.82421 | 493.91287 | 493.06563 | 472.54692 | 473.8093  | 472.59942 | 463.22181 | 437.1462  | 440.15224 |
| <b>377</b>   | 500.79107 | 488.18912 | 487.42775 | 466.8288  | 468.43957 | 467.24585 | 457.88049 | 432.1842  | 435.41789 |
| <b>377.5</b> | 494.83894 | 482.49105 | 481.83885 | 461.19145 | 463.11196 | 461.96104 | 452.59142 | 427.272   | 430.74488 |
| <b>378</b>   | 488.9695  | 476.82748 | 476.31675 | 455.63998 | 457.83594 | 456.75307 | 447.38637 | 422.41809 | 426.14764 |
| <b>378.5</b> | 483.19207 | 471.21983 | 470.87739 | 450.17538 | 452.63025 | 451.62288 | 442.2867  | 417.63275 | 421.63094 |
| <b>379</b>   | 477.52196 | 465.68333 | 465.53097 | 444.79819 | 447.51693 | 446.57759 | 437.29183 | 412.9115  | 417.19453 |
| <b>379.5</b> | 471.97531 | 460.23632 | 460.28432 | 439.51817 | 442.50603 | 441.61655 | 432.38497 | 408.24142 | 412.83751 |
| <b>380</b>   | 466.54549 | 454.88544 | 455.14001 | 434.33413 | 437.59711 | 436.74189 | 427.55559 | 403.61303 | 408.55719 |
| <b>380.5</b> | 461.2154  | 449.64731 | 450.09076 | 429.23507 | 432.78593 | 431.95262 | 422.81015 | 399.03364 | 404.34809 |

|              |           |           |           |           |           |           |           |           |           |
|--------------|-----------|-----------|-----------|-----------|-----------|-----------|-----------|-----------|-----------|
| <b>381</b>   | 455.96347 | 444.53144 | 445.1194  | 424.20401 | 428.07191 | 427.25223 | 418.15475 | 394.51784 | 400.20688 |
| <b>381.5</b> | 450.77447 | 439.54322 | 440.21818 | 419.24058 | 423.44873 | 422.63602 | 413.58544 | 390.08405 | 396.13381 |
| <b>382</b>   | 445.64498 | 434.67059 | 435.39862 | 414.35475 | 418.90453 | 418.09932 | 409.09261 | 385.73977 | 392.13261 |
| <b>382.5</b> | 440.58535 | 429.90251 | 430.68333 | 409.55295 | 414.42834 | 413.64136 | 404.67501 | 381.49294 | 388.20085 |
| <b>383</b>   | 435.61374 | 425.22826 | 426.08538 | 404.82498 | 410.02017 | 409.26447 | 400.33155 | 377.34667 | 384.33592 |
| <b>383.5</b> | 430.74492 | 420.63749 | 421.60131 | 400.16268 | 405.67937 | 404.95996 | 396.0565  | 373.30011 | 380.5371  |
| <b>384</b>   | 425.99326 | 416.11161 | 417.20678 | 395.57097 | 401.40373 | 400.7117  | 391.8388  | 369.33791 | 376.80382 |
| <b>384.5</b> | 421.36231 | 411.63727 | 412.87451 | 391.06182 | 397.18602 | 396.50278 | 387.67284 | 365.44597 | 373.13242 |
| <b>385</b>   | 416.84037 | 407.21384 | 408.57955 | 386.63742 | 393.02215 | 392.33116 | 383.5607  | 361.60805 | 369.51911 |
| <b>385.5</b> | 412.39768 | 402.84875 | 404.31384 | 382.29015 | 388.91042 | 388.19926 | 379.50919 | 357.81085 | 365.95924 |
| <b>386</b>   | 408.00801 | 398.54411 | 400.08245 | 378.01626 | 384.85846 | 384.11297 | 375.51871 | 354.04489 | 362.44174 |
| <b>386.5</b> | 403.65186 | 394.29117 | 395.90443 | 373.81772 | 380.8698  | 380.07056 | 371.5828  | 350.32346 | 358.94823 |
| <b>387</b>   | 399.32449 | 390.07968 | 391.7947  | 369.69073 | 376.93599 | 376.07605 | 367.6928  | 346.66645 | 355.46086 |
| <b>387.5</b> | 395.022   | 385.89991 | 387.75914 | 365.61138 | 373.03873 | 372.13756 | 363.84184 | 343.08372 | 351.96983 |
| <b>388</b>   | 390.74825 | 381.74696 | 383.78714 | 361.55468 | 369.16634 | 368.25603 | 360.02535 | 339.56193 | 348.47573 |
| <b>388.5</b> | 386.49436 | 377.61432 | 379.85497 | 357.50998 | 365.30862 | 364.41333 | 356.24137 | 336.08369 | 344.98167 |
| <b>389</b>   | 382.24935 | 373.50203 | 375.92876 | 353.48813 | 361.45154 | 360.58504 | 352.48679 | 332.6326  | 341.49032 |
| <b>389.5</b> | 377.99323 | 369.41141 | 371.9766  | 349.49458 | 357.5814  | 356.75483 | 348.74951 | 329.19662 | 338.00001 |
| <b>390</b>   | 373.72379 | 365.34545 | 367.98512 | 345.51945 | 353.69334 | 352.9135  | 345.01474 | 325.75993 | 334.51105 |
| <b>390.5</b> | 369.44649 | 361.29489 | 363.96013 | 341.53901 | 349.78746 | 349.04954 | 341.27178 | 322.30776 | 331.01958 |
| <b>391</b>   | 365.17501 | 357.24707 | 359.91733 | 337.53672 | 345.864   | 345.15209 | 337.51307 | 318.83135 | 327.52058 |
| <b>391.5</b> | 360.90757 | 353.18408 | 355.86269 | 333.51243 | 341.92079 | 341.22174 | 333.7249  | 315.3318  | 324.00456 |
| <b>392</b>   | 356.63588 | 349.09482 | 351.79672 | 329.47325 | 337.96308 | 337.27294 | 329.89578 | 311.81286 | 320.46315 |
| <b>392.5</b> | 352.3428  | 344.9722  | 347.71978 | 325.42402 | 334.00055 | 333.32002 | 326.01976 | 308.273   | 316.88779 |
| <b>393</b>   | 348.01608 | 340.82256 | 343.63425 | 321.37093 | 330.03786 | 329.36279 | 322.10563 | 304.70829 | 313.27526 |
| <b>393.5</b> | 343.64587 | 336.65618 | 339.53329 | 317.32708 | 326.06118 | 325.38678 | 318.16647 | 301.11729 | 309.62436 |
| <b>394</b>   | 339.23643 | 332.48141 | 335.41026 | 313.30446 | 322.05372 | 321.3798  | 314.21316 | 297.49985 | 305.94084 |
| <b>394.5</b> | 334.80819 | 328.29405 | 331.25984 | 309.29639 | 318.0107  | 317.34485 | 310.24819 | 293.85097 | 302.23141 |
| <b>395</b>   | 330.39687 | 324.08707 | 327.08613 | 305.27484 | 313.93847 | 313.28636 | 306.27394 | 290.16468 | 298.50822 |
| <b>395.5</b> | 326.02823 | 319.85634 | 322.88934 | 301.21166 | 309.83716 | 309.19956 | 302.29291 | 286.44251 | 294.78112 |

|              |           |           |           |           |           |           |           |           |           |
|--------------|-----------|-----------|-----------|-----------|-----------|-----------|-----------|-----------|-----------|
| <b>396</b>   | 321.69813 | 315.60142 | 318.67249 | 297.10115 | 305.70989 | 305.07771 | 298.30555 | 282.69281 | 291.05785 |
| <b>396.5</b> | 317.3805  | 311.31966 | 314.43751 | 292.95973 | 301.5676  | 300.92909 | 294.30859 | 278.92188 | 287.33567 |
| <b>397</b>   | 313.05122 | 307.00891 | 310.19059 | 288.80541 | 297.42553 | 296.77197 | 290.30438 | 275.13338 | 283.60894 |
| <b>397.5</b> | 308.6946  | 302.67584 | 305.93496 | 284.64173 | 293.28838 | 292.61444 | 286.29525 | 271.33215 | 279.87148 |
| <b>398</b>   | 304.30187 | 298.33595 | 301.67065 | 280.46767 | 289.15397 | 288.45026 | 282.28055 | 267.52179 | 276.12238 |
| <b>398.5</b> | 299.87457 | 294.00407 | 297.394   | 276.29428 | 285.0187  | 284.27583 | 278.25765 | 263.70015 | 272.35787 |
| <b>399</b>   | 295.42373 | 289.68322 | 293.10824 | 272.13714 | 280.88891 | 280.10393 | 274.22754 | 259.86549 | 268.5815  |
| <b>399.5</b> | 290.97011 | 285.36417 | 288.82462 | 268.00129 | 276.77316 | 275.95784 | 270.19204 | 256.02578 | 264.80835 |
| <b>400</b>   | 286.53749 | 281.03646 | 284.54958 | 263.87708 | 272.6796  | 271.85011 | 266.15422 | 252.20391 | 261.05889 |
| <b>400.5</b> | 282.1517  | 276.70369 | 280.28237 | 259.75831 | 268.61134 | 267.78169 | 262.12369 | 248.42312 | 257.34169 |
| <b>401</b>   | 277.82486 | 272.38305 | 276.02345 | 255.65072 | 264.57619 | 263.74747 | 258.12045 | 244.6959  | 253.65708 |
| <b>401.5</b> | 273.55961 | 268.09733 | 271.78377 | 251.56734 | 260.57746 | 259.74542 | 254.16484 | 241.01408 | 250.00967 |
| <b>402</b>   | 269.35292 | 263.86124 | 267.57428 | 247.51945 | 256.615   | 255.77305 | 250.26355 | 237.36316 | 246.40747 |
| <b>402.5</b> | 265.2066  | 259.68654 | 263.40445 | 243.51167 | 252.68847 | 251.8263  | 246.40682 | 233.73427 | 242.85253 |
| <b>403</b>   | 261.11768 | 255.58417 | 259.28168 | 239.5478  | 248.8079  | 247.90516 | 242.58284 | 230.13057 | 239.33791 |
| <b>403.5</b> | 257.08923 | 251.5627  | 255.21772 | 235.63745 | 244.97996 | 244.01979 | 238.78988 | 226.55527 | 235.86035 |
| <b>404</b>   | 253.11874 | 247.61668 | 251.22059 | 231.7911  | 241.20582 | 240.18709 | 235.02965 | 223.01375 | 232.42191 |
| <b>404.5</b> | 249.20029 | 243.7309  | 247.29496 | 228.01042 | 237.48209 | 236.42025 | 231.30213 | 219.51706 | 229.03164 |
| <b>405</b>   | 245.32247 | 239.89119 | 243.43404 | 224.28472 | 233.80998 | 232.72552 | 227.61437 | 216.0857  | 225.69063 |
| <b>405.5</b> | 241.48395 | 236.09904 | 239.63025 | 220.60866 | 230.19104 | 229.10407 | 223.98365 | 212.73391 | 222.39607 |
| <b>406</b>   | 237.6852  | 232.35921 | 235.88456 | 216.99438 | 226.62671 | 225.55396 | 220.42374 | 209.4647  | 219.14167 |
| <b>406.5</b> | 233.92858 | 228.67356 | 232.21115 | 213.46261 | 223.11412 | 222.06938 | 216.93309 | 206.26587 | 215.92622 |
| <b>407</b>   | 230.21502 | 225.0393  | 228.61903 | 210.02357 | 219.65049 | 218.6458  | 213.49927 | 203.12721 | 212.74447 |
| <b>407.5</b> | 226.55146 | 221.45921 | 225.10479 | 206.67309 | 216.23572 | 215.2868  | 210.11593 | 200.04274 | 209.59288 |
| <b>408</b>   | 222.94669 | 217.94112 | 221.65522 | 203.39979 | 212.87621 | 212.00044 | 206.78864 | 197.01474 | 206.47484 |
| <b>408.5</b> | 219.41231 | 214.48877 | 218.26147 | 200.19354 | 209.57575 | 208.78683 | 203.52572 | 194.04043 | 203.41149 |
| <b>409</b>   | 215.95598 | 211.10046 | 214.91588 | 197.0445  | 206.33958 | 205.6367  | 200.33116 | 191.11715 | 200.42149 |
| <b>409.5</b> | 212.5751  | 207.78092 | 211.61997 | 193.9432  | 203.17403 | 202.53834 | 197.20967 | 188.24527 | 197.51065 |
| <b>410</b>   | 209.26244 | 204.54014 | 208.38217 | 190.88646 | 200.08762 | 199.48922 | 194.17144 | 185.43817 | 194.66886 |
| <b>410.5</b> | 206.017   | 201.38286 | 205.22346 | 187.88347 | 197.08165 | 196.49424 | 191.22081 | 182.7089  | 191.88817 |



|              |           |           |           |           |           |           |           |           |           |
|--------------|-----------|-----------|-----------|-----------|-----------|-----------|-----------|-----------|-----------|
| <b>411</b>   | 202.84491 | 198.3014  | 202.16297 | 184.95363 | 194.15266 | 193.55958 | 188.34535 | 180.06236 | 189.16225 |
| <b>411.5</b> | 199.74875 | 195.28949 | 199.20861 | 182.11291 | 191.28954 | 190.68571 | 185.52904 | 177.48984 | 186.48832 |
| <b>412</b>   | 196.72784 | 192.34854 | 196.34624 | 179.36325 | 188.48357 | 187.8715  | 182.76704 | 174.98145 | 183.86049 |
| <b>412.5</b> | 193.77838 | 189.4844  | 193.5507  | 176.69129 | 185.73288 | 185.11849 | 180.06588 | 172.52859 | 181.2795  |
| <b>413</b>   | 190.89837 | 186.69653 | 190.80037 | 174.08427 | 183.0408  | 182.42668 | 177.42793 | 170.12943 | 178.75174 |
| <b>413.5</b> | 188.081   | 183.9821  | 188.08431 | 171.53744 | 180.40681 | 179.78839 | 174.8489  | 167.78168 | 176.29004 |
| <b>414</b>   | 185.32319 | 181.33769 | 185.3993  | 169.059   | 177.82769 | 177.19544 | 172.32351 | 165.48355 | 173.9013  |
| <b>414.5</b> | 182.61933 | 178.7622  | 182.75092 | 166.6521  | 175.30405 | 174.64366 | 169.84853 | 163.23349 | 171.58269 |
| <b>415</b>   | 179.9672  | 176.25299 | 180.15447 | 164.31131 | 172.8384  | 172.13348 | 167.42165 | 161.03378 | 169.32662 |
| <b>415.5</b> | 177.35747 | 173.80091 | 177.62547 | 162.02284 | 170.42879 | 169.66565 | 165.03754 | 158.88383 | 167.12806 |
| <b>416</b>   | 174.78803 | 171.39487 | 175.16875 | 159.78491 | 168.06749 | 167.24642 | 162.69326 | 156.77958 | 164.98319 |
| <b>416.5</b> | 172.25945 | 169.03002 | 172.77616 | 157.6057  | 165.74395 | 164.88334 | 160.39373 | 154.71236 | 162.88228 |
| <b>417</b>   | 169.78397 | 166.70948 | 170.43749 | 155.48688 | 163.4521  | 162.57623 | 158.1514  | 152.67813 | 160.81555 |
| <b>417.5</b> | 167.36824 | 164.43555 | 168.14303 | 153.41045 | 161.19415 | 160.31477 | 155.97481 | 150.67276 | 158.77921 |
| <b>418</b>   | 165.01666 | 162.20384 | 165.88778 | 151.35322 | 158.97707 | 158.09008 | 153.86518 | 148.69505 | 156.7751  |
| <b>418.5</b> | 162.72432 | 160.00689 | 163.66663 | 149.30707 | 156.80346 | 155.90521 | 151.81442 | 146.74135 | 154.8001  |
| <b>419</b>   | 160.49413 | 157.83909 | 161.47887 | 147.28015 | 154.66833 | 153.77159 | 149.80892 | 144.80959 | 152.85005 |
| <b>419.5</b> | 158.32576 | 155.69742 | 159.31861 | 145.27709 | 152.56237 | 151.69152 | 147.83265 | 142.89529 | 150.9256  |
| <b>420</b>   | 156.21147 | 153.5818  | 157.17854 | 143.29089 | 150.47775 | 149.65085 | 145.87549 | 140.99696 | 149.03261 |
| <b>420.5</b> | 154.12662 | 151.48846 | 155.05034 | 141.31648 | 148.41244 | 147.63217 | 143.93347 | 139.11552 | 147.17283 |
| <b>421</b>   | 152.05478 | 149.41231 | 152.93618 | 139.36337 | 146.36924 | 145.63151 | 142.00792 | 137.25145 | 145.34399 |
| <b>421.5</b> | 149.9967  | 147.34969 | 150.84072 | 137.44832 | 144.3467  | 143.6517  | 140.10017 | 135.40221 | 143.54391 |
| <b>422</b>   | 147.9664  | 145.30623 | 148.76653 | 135.5784  | 142.33969 | 141.68587 | 138.21162 | 133.5665  | 141.77637 |
| <b>422.5</b> | 145.96886 | 143.28767 | 146.7079  | 133.74734 | 140.34868 | 139.72154 | 136.34287 | 131.74915 | 140.04264 |
| <b>423</b>   | 144.00112 | 141.29728 | 144.66307 | 131.94617 | 138.38321 | 137.75746 | 134.49588 | 129.95777 | 138.33759 |
| <b>423.5</b> | 142.05883 | 139.33135 | 142.6383  | 130.17181 | 136.44982 | 135.80972 | 132.67118 | 128.19786 | 136.65219 |
| <b>424</b>   | 140.14444 | 137.38872 | 140.64391 | 128.41735 | 134.54764 | 133.89308 | 130.86502 | 126.47005 | 134.98124 |
| <b>424.5</b> | 138.25987 | 135.47078 | 138.67884 | 126.67379 | 132.66997 | 132.00878 | 129.07348 | 124.77089 | 133.32334 |
| <b>425</b>   | 136.40087 | 133.58441 | 136.73343 | 124.93192 | 130.81674 | 130.14461 | 127.29603 | 123.09626 | 131.67335 |
| <b>425.5</b> | 134.55578 | 131.73362 | 134.80353 | 123.19187 | 128.99102 | 128.2917  | 125.53652 | 121.43979 | 130.02658 |

|              |           |           |           |           |           |           |           |           |           |
|--------------|-----------|-----------|-----------|-----------|-----------|-----------|-----------|-----------|-----------|
| <b>426</b>   | 132.71511 | 129.9176  | 132.8964  | 121.45954 | 127.19632 | 126.44789 | 123.79538 | 119.79327 | 128.38366 |
| <b>426.5</b> | 130.87973 | 128.12797 | 131.01911 | 119.74805 | 125.42776 | 124.61768 | 122.06644 | 118.14979 | 126.75293 |
| <b>427</b>   | 129.0546  | 126.35812 | 129.1687  | 118.07115 | 123.68221 | 122.80305 | 120.34366 | 116.51073 | 125.13865 |
| <b>427.5</b> | 127.24434 | 124.6049  | 127.34074 | 116.43684 | 121.95895 | 121.00911 | 118.63137 | 114.88814 | 123.54134 |
| <b>428</b>   | 125.45266 | 122.86774 | 125.53533 | 114.84477 | 120.26049 | 119.24371 | 116.94402 | 113.29369 | 121.95982 |
| <b>428.5</b> | 123.68496 | 121.13736 | 123.75794 | 113.28883 | 118.58292 | 117.51561 | 115.29264 | 111.73085 | 120.39839 |
| <b>429</b>   | 121.94051 | 119.40543 | 122.01053 | 111.75843 | 116.92468 | 115.82374 | 113.67562 | 110.19566 | 118.85769 |
| <b>429.5</b> | 120.21655 | 117.67496 | 120.29205 | 110.24282 | 115.28391 | 114.16239 | 112.08791 | 108.68688 | 117.33261 |
| <b>430</b>   | 118.51045 | 115.96132 | 118.59884 | 108.73768 | 113.65919 | 112.5242  | 110.52907 | 107.20619 | 115.81381 |
| <b>430.5</b> | 116.8211  | 114.27578 | 116.9306  | 107.24692 | 112.04291 | 110.90929 | 108.99754 | 105.7524  | 114.29941 |
| <b>431</b>   | 115.14264 | 112.61963 | 115.28837 | 105.77469 | 110.43235 | 109.32013 | 107.48243 | 104.31972 | 112.79475 |
| <b>431.5</b> | 113.47152 | 110.98877 | 113.67234 | 104.31894 | 108.83027 | 107.75912 | 105.97234 | 102.90247 | 111.30667 |
| <b>432</b>   | 111.81204 | 109.3823  | 112.07949 | 102.87463 | 107.2473  | 106.22485 | 104.46583 | 101.50353 | 109.83647 |
| <b>432.5</b> | 110.1759  | 107.79893 | 110.51016 | 101.43906 | 105.69207 | 104.71595 | 102.97243 | 100.13089 | 108.38623 |
| <b>433</b>   | 108.57041 | 106.23595 | 108.96487 | 100.01391 | 104.17246 | 103.22859 | 101.50047 | 98.79386  | 106.95999 |
| <b>433.5</b> | 106.99638 | 104.68678 | 107.44449 | 98.60311  | 102.69143 | 101.75491 | 100.051   | 97.49317  | 105.56337 |
| <b>434</b>   | 105.45    | 103.15047 | 105.94769 | 97.21441  | 101.25258 | 100.28765 | 98.62441  | 96.22457  | 104.19482 |
| <b>434.5</b> | 103.93268 | 101.63081 | 104.47649 | 95.85458  | 99.85422  | 98.82962  | 97.22617  | 94.98126  | 102.85095 |
| <b>435</b>   | 102.44811 | 100.13462 | 103.03047 | 94.5295   | 98.48858  | 97.3924   | 95.86155  | 93.7607   | 101.53177 |
| <b>435.5</b> | 100.99769 | 98.66438  | 101.60615 | 93.23834  | 97.14295  | 95.98916  | 94.52731  | 92.55823  | 100.24464 |
| <b>436</b>   | 99.57555  | 97.22388  | 100.19761 | 91.97478  | 95.81035  | 94.62667  | 93.21701  | 91.36992  | 98.99195  |
| <b>436.5</b> | 98.17836  | 95.81885  | 98.80205  | 90.72766  | 94.48995  | 93.30516  | 91.9307   | 90.19229  | 97.76899  |
| <b>437</b>   | 96.80852  | 94.45231  | 97.42038  | 89.48835  | 93.18677  | 92.02025  | 90.6714   | 89.0295   | 96.56588  |
| <b>437.5</b> | 95.4672   | 93.11935  | 96.05873  | 88.25256  | 91.90474  | 90.76576  | 89.43846  | 87.88684  | 95.3793   |
| <b>438</b>   | 94.15001  | 91.81313  | 94.72575  | 87.02545  | 90.64865  | 89.53399  | 88.22567  | 86.77036  | 94.21125  |
| <b>438.5</b> | 92.85412  | 90.53275  | 93.42904  | 85.81558  | 89.42191  | 88.31802  | 87.03105  | 85.68025  | 93.06417  |
| <b>439</b>   | 91.58328  | 89.28101  | 92.17156  | 84.62976  | 88.22711  | 87.11365  | 85.85564  | 84.61366  | 91.93705  |
| <b>439.5</b> | 90.34415  | 88.05892  | 90.95307  | 83.46175  | 87.06099  | 85.91921  | 84.70307  | 83.56362  | 90.83015  |
| <b>440</b>   | 89.139    | 86.86136  | 89.76844  | 82.30262  | 85.91597  | 84.73656  | 83.57463  | 82.526    | 89.74658  |
| <b>440.5</b> | 87.96439  | 85.68025  | 88.6096   | 81.15072  | 84.78425  | 83.57262  | 82.47241  | 81.49829  | 88.68802  |

|       |          |          |          |          |          |          |          |          |          |
|-------|----------|----------|----------|----------|----------|----------|----------|----------|----------|
| 441   | 86.8195  | 84.51343 | 87.46899 | 80.01799 | 83.6628  | 82.43764 | 81.39775 | 80.48075 | 87.64855 |
| 441.5 | 85.7046  | 83.36683 | 86.34455 | 78.91063 | 82.55289 | 81.33542 | 80.35331 | 79.47338 | 86.62061 |
| 442   | 84.61911 | 82.24691 | 85.2387  | 77.82339 | 81.45701 | 80.26068 | 79.33869 | 78.47988 | 85.60058 |
| 442.5 | 83.55794 | 81.1525  | 84.1532  | 76.74647 | 80.37751 | 79.20879 | 78.35061 | 77.50416 | 84.5896  |
| 443   | 82.51892 | 80.07677 | 83.08653 | 75.68314 | 79.31643 | 78.1833  | 77.38054 | 76.54958 | 83.58551 |
| 443.5 | 81.50381 | 79.01624 | 82.03277 | 74.64388 | 78.27575 | 77.18866 | 76.41875 | 75.6149  | 82.58627 |
| 444   | 80.52007 | 77.97464 | 80.98652 | 73.63507 | 77.25342 | 76.21949 | 75.45682 | 74.69849 | 81.5966  |
| 444.5 | 79.56956 | 76.95794 | 79.94737 | 72.65321 | 76.24402 | 75.26318 | 74.49456 | 73.79924 | 80.62868 |
| 445   | 78.64898 | 75.96689 | 78.92003 | 71.69713 | 75.2447  | 74.31331 | 73.53736 | 72.9184  | 79.69272 |
| 445.5 | 77.74177 | 74.99219 | 77.91094 | 70.77376 | 74.26133 | 73.37    | 72.59107 | 72.05604 | 78.78811 |
| 446   | 76.84783 | 74.03455 | 76.92376 | 69.89158 | 73.29679 | 72.4383  | 71.65927 | 71.20771 | 77.91379 |
| 446.5 | 75.96785 | 73.09682 | 75.96014 | 69.05155 | 72.34825 | 71.51959 | 70.74562 | 70.37084 | 77.06566 |
| 447   | 75.10013 | 72.1815  | 75.01781 | 68.24612 | 71.4109  | 70.61393 | 69.85432 | 69.54638 | 76.23431 |
| 447.5 | 74.23638 | 71.2849  | 74.09195 | 67.46559 | 70.48566 | 69.72717 | 68.98969 | 68.73716 | 75.4045  |
| 448   | 73.32767 | 70.36621 | 73.1335  | 66.61424 | 69.55518 | 68.82835 | 68.0906  | 67.9106  | 74.52965 |
| 448.5 | 72.43179 | 69.46369 | 72.18852 | 65.77955 | 68.63808 | 67.94405 | 67.20326 | 67.09629 | 73.66481 |
| 449   | 71.54875 | 68.57733 | 71.25703 | 64.96153 | 67.73438 | 67.0743  | 66.32767 | 66.29424 | 72.80999 |
| 449.5 | 70.67855 | 67.70714 | 70.33903 | 64.16018 | 66.84407 | 66.21907 | 65.46384 | 65.50444 | 71.9652  |
| 450   | 69.82119 | 66.85312 | 69.43451 | 63.3755  | 65.96716 | 65.37838 | 64.61176 | 64.7269  | 71.13042 |
| 450.5 | 68.97667 | 66.01527 | 68.54348 | 62.60748 | 65.10363 | 64.55223 | 63.77143 | 63.96161 | 70.30567 |
| 451   | 68.145   | 65.19359 | 67.66593 | 61.85613 | 64.2535  | 63.74061 | 62.94285 | 63.20858 | 69.49093 |
| 451.5 | 67.32616 | 64.38807 | 66.80187 | 61.12144 | 63.41676 | 62.94352 | 62.12602 | 62.46781 | 68.68622 |
| 452   | 66.52016 | 63.59872 | 65.95129 | 60.40342 | 62.59341 | 62.16097 | 61.32095 | 61.73929 | 67.89153 |
| 452.5 | 65.727   | 62.82554 | 65.11419 | 59.70207 | 61.78345 | 61.39295 | 60.52763 | 61.02303 | 67.10685 |
| 453   | 64.94668 | 62.06853 | 64.29059 | 59.01738 | 60.98689 | 60.63946 | 59.74606 | 60.31903 | 66.3322  |
| 453.5 | 64.1792  | 61.32769 | 63.48046 | 58.34937 | 60.20372 | 59.90051 | 58.97624 | 59.62728 | 65.56757 |
| 454   | 63.42456 | 60.60301 | 62.68383 | 57.69801 | 59.43394 | 59.1761  | 58.21818 | 58.94779 | 64.81296 |
| 454.5 | 62.68276 | 59.89451 | 61.90067 | 57.06333 | 58.67755 | 58.46622 | 57.47187 | 58.28055 | 64.06837 |
| 455   | 61.9538  | 59.20217 | 61.13101 | 56.44531 | 57.93455 | 57.77087 | 56.73731 | 57.62557 | 63.3338  |
| 455.5 | 61.23768 | 58.52599 | 60.37482 | 55.84396 | 57.20495 | 57.09006 | 56.0145  | 56.98284 | 62.60925 |

|              |          |          |          |          |          |          |          |          |          |
|--------------|----------|----------|----------|----------|----------|----------|----------|----------|----------|
| <b>456</b>   | 60.5344  | 57.86599 | 59.63213 | 55.25928 | 56.48874 | 56.42378 | 55.30345 | 56.35238 | 61.89472 |
| <b>456.5</b> | 59.84396 | 57.22215 | 58.90291 | 54.69126 | 55.78592 | 55.77203 | 54.60415 | 55.73416 | 61.19021 |
| <b>457</b>   | 59.16636 | 56.59448 | 58.18719 | 54.13991 | 55.09649 | 55.13482 | 53.9166  | 55.12821 | 60.49572 |
| <b>457.5</b> | 58.5016  | 55.98298 | 57.48495 | 53.60522 | 54.42045 | 54.51215 | 53.2408  | 54.53451 | 59.81126 |
| <b>458</b>   | 57.84967 | 55.38765 | 56.79619 | 53.0872  | 53.75781 | 53.904   | 52.57676 | 53.95306 | 59.13681 |
| <b>458.5</b> | 57.21059 | 54.80849 | 56.12092 | 52.58585 | 53.10856 | 53.3104  | 51.92447 | 53.38388 | 58.47238 |
| <b>459</b>   | 56.58435 | 54.24549 | 55.45913 | 52.10117 | 52.4727  | 52.73132 | 51.28393 | 52.82694 | 57.81798 |
| <b>459.5</b> | 55.97095 | 53.69866 | 54.81083 | 51.63315 | 51.85023 | 52.16678 | 50.65514 | 52.28227 | 57.17359 |
| <b>460</b>   | 55.37039 | 53.168   | 54.17601 | 51.1818  | 51.24116 | 51.61678 | 50.0381  | 51.74985 | 56.53923 |

|              | <b>0wks</b>  | <b>0wks</b>  | <b>6wks</b>  | <b>6wks</b>  | <b>6wks</b>  | <b>6wks</b>  | <b>10wks</b> | <b>10wks</b> | <b>10wks</b> | <b>10wks</b> |
|--------------|--------------|--------------|--------------|--------------|--------------|--------------|--------------|--------------|--------------|--------------|
|              | <b>33%RH</b> | <b>74%RH</b> | <b>4°C</b>   | <b>37°C</b>  | <b>4°C</b>   | <b>37°C</b>  | <b>4°C</b>   | <b>37°C</b>  | <b>4°C</b>   | <b>37°C</b>  |
|              |              |              | <b>33%RH</b> | <b>33%RH</b> | <b>74%RH</b> | <b>74%RH</b> | <b>33%RH</b> | <b>33%RH</b> | <b>74%RH</b> | <b>74%RH</b> |
| <b>300</b>   | 440.46478    | 397.85801    | 425.00499    | 351.65536    | 518.19958    | 468.67357    | 506.01388    | 387.60091    | 444.43201    | 413.63838    |
| <b>300.5</b> | 435.20545    | 393.59955    | 419.92788    | 348.49169    | 510.64465    | 462.25404    | 498.48291    | 383.32856    | 438.52711    | 408.53281    |
| <b>301</b>   | 429.94612    | 389.34109    | 414.85077    | 345.32802    | 503.08971    | 455.83451    | 490.95194    | 379.05621    | 432.62221    | 403.42725    |
| <b>301.5</b> | 424.6868     | 385.08262    | 409.77366    | 342.16434    | 495.53478    | 449.41498    | 483.42097    | 374.78386    | 426.71732    | 398.32168    |
| <b>302</b>   | 419.42747    | 380.82416    | 404.69655    | 339.00067    | 487.97985    | 442.99545    | 475.89       | 370.51151    | 420.81242    | 393.21611    |
| <b>302.5</b> | 414.16814    | 376.5657     | 399.61944    | 335.837      | 480.42492    | 436.57592    | 468.35903    | 366.23916    | 414.90753    | 388.11055    |
| <b>303</b>   | 408.90881    | 372.30724    | 394.54234    | 332.67332    | 472.86998    | 430.15639    | 460.82806    | 361.96681    | 409.00263    | 383.00498    |
| <b>303.5</b> | 403.64948    | 368.04878    | 389.46523    | 329.50965    | 465.31505    | 423.73686    | 453.29709    | 357.69446    | 403.09773    | 377.89941    |
| <b>304</b>   | 398.39015    | 363.79032    | 384.38812    | 326.34598    | 457.76012    | 417.31732    | 445.76612    | 353.42211    | 397.19284    | 372.79385    |
| <b>304.5</b> | 393.13082    | 359.53186    | 379.31101    | 323.1823     | 450.20519    | 410.89779    | 438.23514    | 349.14976    | 391.28794    | 367.68828    |
| <b>305</b>   | 387.8715     | 355.27339    | 374.2339     | 320.01863    | 442.65026    | 404.47826    | 430.70417    | 344.87741    | 385.38305    | 362.58271    |
| <b>305.5</b> | 382.61217    | 351.01493    | 369.15679    | 316.85496    | 435.09532    | 398.05873    | 423.1732     | 340.60506    | 379.47815    | 357.47715    |
| <b>306</b>   | 377.35284    | 346.75647    | 364.07968    | 313.69128    | 427.54039    | 391.6392     | 415.64223    | 336.33271    | 373.57325    | 352.37158    |
| <b>306.5</b> | 372.09351    | 342.49801    | 359.00257    | 310.52761    | 419.98546    | 385.21967    | 408.11126    | 332.06036    | 367.66836    | 347.26601    |
| <b>307</b>   | 366.83418    | 338.23955    | 353.92546    | 307.36394    | 412.43053    | 378.80014    | 400.58029    | 327.78801    | 361.76346    | 342.16045    |
| <b>307.5</b> | 361.57485    | 333.98109    | 348.84835    | 304.20026    | 404.8756     | 372.38061    | 393.04932    | 323.51566    | 355.85857    | 337.05488    |
| <b>308</b>   | 356.31553    | 329.72262    | 343.77124    | 301.03659    | 397.32066    | 365.96108    | 385.51835    | 319.24331    | 349.95367    | 331.94931    |
| <b>308.5</b> | 351.0562     | 325.46416    | 338.69413    | 297.87292    | 389.76573    | 359.54154    | 377.98738    | 314.97096    | 344.04878    | 326.84375    |
| <b>309</b>   | 345.79687    | 321.2057     | 333.61702    | 294.70924    | 382.2108     | 353.12201    | 370.45641    | 310.69861    | 338.14388    | 321.73818    |
| <b>309.5</b> | 340.53754    | 316.94724    | 328.53991    | 291.54557    | 374.65587    | 346.70248    | 362.92543    | 306.42626    | 332.23898    | 316.63261    |
| <b>310</b>   | 335.27821    | 312.68878    | 323.4628     | 288.3819     | 367.10094    | 340.28295    | 355.39446    | 302.15391    | 326.33409    | 311.52705    |
| <b>310.5</b> | 330.01888    | 308.43032    | 318.38569    | 285.21822    | 359.546      | 333.86342    | 347.86349    | 297.88156    | 320.42919    | 306.42148    |
| <b>311</b>   | 324.75955    | 304.17186    | 313.30858    | 282.05455    | 351.99107    | 327.44389    | 340.33252    | 293.60921    | 314.5243     | 301.31592    |
| <b>311.5</b> | 319.50023    | 299.91339    | 308.23147    | 278.89088    | 344.43614    | 321.02436    | 332.80155    | 289.33686    | 308.6194     | 296.21035    |
| <b>312</b>   | 314.2409     | 295.65493    | 303.15436    | 275.7272     | 336.88121    | 314.60483    | 325.27058    | 285.06451    | 302.7145     | 291.10478    |
| <b>312.5</b> | 308.98157    | 291.39647    | 298.07725    | 272.56353    | 329.32627    | 308.18529    | 317.73961    | 280.79216    | 296.80961    | 285.99922    |
| <b>313</b>   | 311.46196    | 294.26373    | 300.51196    | 275.67765    | 330.78627    | 310.00647    | 318.98196    | 283.47294    | 298.75392    | 285.66078    |

|              |           |           |           |           |           |           |           |           |           |           |
|--------------|-----------|-----------|-----------|-----------|-----------|-----------|-----------|-----------|-----------|-----------|
| <b>313.5</b> | 312.82353 | 296.05451 | 301.81627 | 278.01314 | 330.64647 | 310.39824 | 318.66216 | 285.27627 | 299.42431 | 284.33176 |
| <b>314</b>   | 312.99745 | 296.72549 | 301.95451 | 279.48471 | 328.99706 | 309.46059 | 316.8849  | 286.02667 | 298.8198  | 282.13843 |
| <b>314.5</b> | 312.05588 | 296.43039 | 301.04078 | 280.13314 | 326.09784 | 307.41961 | 313.92059 | 285.73902 | 297.13706 | 279.31882 |
| <b>315</b>   | 310.15882 | 295.38529 | 299.2298  | 280.06275 | 322.10137 | 304.47373 | 309.95353 | 284.5902  | 294.49667 | 275.92275 |
| <b>315.5</b> | 307.58686 | 293.8098  | 296.81765 | 279.45157 | 317.30039 | 300.81961 | 305.31196 | 282.86275 | 291.13922 | 272.21608 |
| <b>316</b>   | 304.49412 | 291.73549 | 293.8902  | 278.35294 | 311.88882 | 296.51765 | 300.09529 | 280.64    | 287.14725 | 268.42    |
| <b>316.5</b> | 301.13745 | 289.33275 | 290.68412 | 276.97373 | 306.25412 | 291.84804 | 294.53216 | 278.10431 | 282.87647 | 264.97137 |
| <b>317</b>   | 297.76902 | 286.83706 | 287.39824 | 275.56922 | 300.5798  | 287.07745 | 288.74608 | 275.48902 | 278.59275 | 262.26529 |
| <b>317.5</b> | 294.83196 | 284.70314 | 284.50176 | 274.52843 | 295.38961 | 282.77275 | 283.3751  | 273.1902  | 274.7749  | 260.68922 |
| <b>318</b>   | 292.75706 | 283.36275 | 282.36275 | 274.13353 | 291.12569 | 279.32196 | 278.96608 | 271.53627 | 271.69804 | 260.35608 |
| <b>318.5</b> | 291.94588 | 283.16863 | 281.42627 | 274.69157 | 288.32314 | 277.18059 | 276.06059 | 270.87529 | 269.83235 | 261.33588 |
| <b>319</b>   | 292.48157 | 284.2298  | 281.87451 | 276.35333 | 287.04725 | 276.47804 | 274.62176 | 271.36098 | 269.33333 | 263.55686 |
| <b>319.5</b> | 294.48667 | 286.60098 | 283.85157 | 279.23745 | 287.43882 | 277.41039 | 274.80961 | 273.15588 | 270.40216 | 267.02706 |
| <b>320</b>   | 297.86627 | 290.19529 | 287.14784 | 283.26118 | 289.4649  | 279.80745 | 276.52667 | 276.22706 | 272.83314 | 271.58216 |
| <b>320.5</b> | 302.56588 | 294.9549  | 291.63941 | 288.35961 | 293.12784 | 283.55314 | 279.85706 | 280.5298  | 276.54275 | 277.13824 |
| <b>321</b>   | 308.33627 | 300.74412 | 297.12451 | 294.39608 | 298.08451 | 288.36588 | 284.42647 | 285.82196 | 281.25    | 283.5702  |
| <b>321.5</b> | 315.13294 | 307.52549 | 303.6102  | 301.3102  | 304.11529 | 294.22451 | 290.1098  | 292.02471 | 286.98431 | 290.79529 |
| <b>322</b>   | 322.82608 | 315.17706 | 311.01176 | 309.0002  | 311.05784 | 301.03608 | 296.66078 | 299.05098 | 293.61608 | 298.63039 |
| <b>322.5</b> | 331.35784 | 323.54549 | 319.21216 | 317.39392 | 318.83275 | 308.67647 | 304.05235 | 306.85098 | 301.07863 | 306.88    |
| <b>323</b>   | 340.49843 | 332.45392 | 327.98353 | 326.33588 | 327.31039 | 316.91804 | 312.12275 | 315.19745 | 309.13882 | 315.38196 |
| <b>323.5</b> | 350.07569 | 341.76569 | 337.13706 | 335.65098 | 336.27196 | 325.59824 | 320.75686 | 323.90333 | 317.6302  | 324.04255 |
| <b>324</b>   | 359.92    | 351.37333 | 346.57569 | 345.19804 | 345.5798  | 334.60706 | 329.74922 | 332.84706 | 326.38961 | 332.81667 |
| <b>324.5</b> | 369.92157 | 361.14451 | 356.19745 | 354.8698  | 355.12255 | 343.84627 | 338.90824 | 341.96314 | 335.27706 | 341.64118 |
| <b>325</b>   | 379.99608 | 370.96294 | 365.9049  | 364.58706 | 364.80176 | 353.19098 | 348.1051  | 351.18157 | 344.21941 | 350.46039 |
| <b>325.5</b> | 390.12765 | 380.77765 | 375.61961 | 374.29647 | 374.51569 | 362.55882 | 357.32333 | 360.43451 | 353.1798  | 359.24647 |
| <b>326</b>   | 400.29078 | 390.60667 | 385.32451 | 383.99314 | 384.19098 | 371.92078 | 366.57608 | 369.65804 | 362.13314 | 367.98196 |
| <b>326.5</b> | 410.42745 | 400.43294 | 394.9949  | 393.65765 | 393.79941 | 381.26588 | 375.86235 | 378.80922 | 371.0349  | 376.63608 |
| <b>327</b>   | 420.49784 | 410.22275 | 404.61255 | 403.30588 | 403.38275 | 390.57039 | 385.15902 | 387.8902  | 379.91412 | 385.19784 |
| <b>327.5</b> | 430.47118 | 419.94098 | 414.1698  | 412.90255 | 412.96902 | 399.81373 | 394.43451 | 396.92471 | 388.77922 | 393.71255 |
| <b>328</b>   | 440.39196 | 429.62725 | 423.72608 | 422.45314 | 422.56667 | 409.00549 | 403.66059 | 405.89373 | 397.61882 | 402.21216 |
| <b>328.5</b> | 450.26608 | 439.30549 | 433.27765 | 431.92608 | 432.11098 | 418.1351  | 412.80706 | 414.76608 | 406.34784 | 410.68471 |
| <b>329</b>   | 460.1302  | 448.94078 | 442.81275 | 441.36176 | 441.55196 | 427.21118 | 421.88235 | 423.53078 | 414.94176 | 419.0849  |
| <b>329.5</b> | 469.97529 | 458.46706 | 452.26725 | 450.7502  | 450.86922 | 436.23353 | 430.89431 | 432.23686 | 423.41    | 427.39529 |
| <b>330</b>   | 479.81882 | 467.8851  | 461.63529 | 460.0702  | 460.12157 | 445.22353 | 439.86    | 440.89608 | 431.82137 | 435.61333 |
| <b>330.5</b> | 489.60608 | 477.24255 | 470.89706 | 469.25843 | 469.33804 | 454.17    | 448.75255 | 449.47922 | 440.18725 | 443.75255 |
| <b>331</b>   | 499.29804 | 486.56725 | 480.0751  | 478.34333 | 478.52118 | 463.04549 | 457.56922 | 457.9198  | 448.49255 | 451.7949  |
| <b>331.5</b> | 508.87706 | 495.82118 | 489.15922 | 487.35353 | 487.61588 | 471.79706 | 466.29    | 466.22098 | 456.69922 | 459.70843 |
| <b>332</b>   | 518.33608 | 504.93686 | 498.13333 | 496.3049  | 496.57647 | 480.40235 | 474.91784 | 474.40353 | 464.77529 | 467.44118 |
| <b>332.5</b> | 527.62529 | 513.87451 | 506.91608 | 505.11804 | 505.36235 | 488.84392 | 483.42706 | 482.47941 | 472.67706 | 474.97745 |
| <b>333</b>   | 536.66255 | 522.61902 | 515.44843 | 513.6998  | 513.95    | 497.10196 | 491.77078 | 490.42529 | 480.37314 | 482.33549 |
| <b>333.5</b> | 545.4698  | 531.17314 | 523.76353 | 522.01784 | 522.32961 | 505.16235 | 499.90392 | 498.18314 | 487.87098 | 489.50059 |
| <b>334</b>   | 554.09412 | 539.52941 | 531.91706 | 530.12078 | 530.50667 | 513.02275 | 507.79235 | 505.69275 | 495.19569 | 496.43157 |
| <b>334.5</b> | 562.55863 | 547.6751  | 539.90373 | 538.06039 | 538.45333 | 520.70412 | 515.44784 | 512.92137 | 502.32314 | 503.09843 |
| <b>335</b>   | 570.76902 | 555.58784 | 547.65216 | 545.81118 | 546.12275 | 528.19647 | 522.86863 | 519.89706 | 509.19725 | 509.5198  |

|       |           |           |           |           |           |           |           |           |           |           |
|-------|-----------|-----------|-----------|-----------|-----------|-----------|-----------|-----------|-----------|-----------|
| 335.5 | 578.68549 | 563.24863 | 555.14    | 553.31765 | 553.49176 | 535.46314 | 530.08    | 526.63569 | 515.80059 | 515.70098 |
| 336   | 586.2898  | 570.61843 | 562.35706 | 560.49765 | 560.55078 | 542.41373 | 537.02824 | 533.07176 | 522.12784 | 521.61078 |
| 336.5 | 593.59902 | 577.6849  | 569.28196 | 567.35529 | 567.32765 | 549.00294 | 543.69902 | 539.16196 | 528.18    | 527.23176 |
| 337   | 600.56    | 584.4249  | 575.83843 | 573.89843 | 573.79608 | 555.23667 | 550.06176 | 544.9198  | 533.93882 | 532.58529 |
| 337.5 | 607.20451 | 590.82412 | 582.02784 | 580.19647 | 579.96706 | 561.20471 | 556.12804 | 550.44765 | 539.40039 | 537.69725 |
| 338   | 613.57922 | 596.84804 | 587.90725 | 586.21529 | 585.82353 | 566.95176 | 561.88745 | 555.71157 | 544.57098 | 542.54098 |
| 338.5 | 619.72196 | 602.54549 | 593.57118 | 591.94902 | 591.4298  | 572.47078 | 567.37275 | 560.68216 | 549.48431 | 547.11431 |
| 339   | 625.55725 | 607.97235 | 598.98157 | 597.36216 | 596.77235 | 577.71078 | 572.59804 | 565.31392 | 554.16627 | 551.40765 |
| 339.5 | 631.05588 | 613.18294 | 604.09176 | 602.51176 | 601.86941 | 582.66922 | 577.58667 | 569.68627 | 558.61784 | 555.43255 |
| 340   | 636.24647 | 618.11784 | 608.87196 | 607.38373 | 606.65196 | 587.34824 | 582.27882 | 573.78902 | 562.80059 | 559.18745 |
| 340.5 | 641.19098 | 622.73529 | 613.39333 | 611.99549 | 611.13451 | 591.74961 | 586.65725 | 577.63373 | 566.69275 | 562.69216 |
| 341   | 645.83863 | 627.00471 | 617.66    | 616.2949  | 615.29922 | 595.85882 | 590.72118 | 581.17941 | 570.28157 | 565.94059 |
| 341.5 | 650.1198  | 630.95039 | 621.6402  | 620.27843 | 619.17216 | 599.68275 | 594.49902 | 584.44588 | 573.55686 | 568.91137 |
| 342   | 654.02078 | 634.60706 | 625.29882 | 623.93961 | 622.74647 | 603.22902 | 597.99333 | 587.43608 | 576.52255 | 571.5951  |
| 342.5 | 657.60804 | 638.01647 | 628.69451 | 627.32941 | 626.05588 | 606.49294 | 601.22451 | 590.17118 | 579.19647 | 574.04745 |
| 343   | 660.90647 | 641.16902 | 631.84608 | 630.44294 | 629.09431 | 609.47745 | 604.18412 | 592.64569 | 581.58725 | 576.2998  |
| 343.5 | 663.90706 | 644.04549 | 634.74235 | 633.27314 | 631.85804 | 612.22608 | 606.88157 | 594.84569 | 583.69039 | 578.34784 |
| 344   | 666.59275 | 646.65706 | 637.33333 | 635.81765 | 634.31745 | 614.75471 | 609.34667 | 596.76627 | 585.51569 | 580.17098 |
| 344.5 | 669.01745 | 649.00549 | 639.62608 | 638.10863 | 636.49314 | 617.0498  | 611.58627 | 598.42863 | 587.09608 | 581.77824 |
| 345   | 671.21157 | 651.08745 | 641.63863 | 640.1502  | 638.43412 | 619.0851  | 613.60961 | 599.85078 | 588.45569 | 583.13961 |
| 345.5 | 673.19941 | 652.90922 | 643.42549 | 641.94216 | 640.16137 | 620.88706 | 615.4002  | 601.02647 | 589.60608 | 584.24902 |
| 346   | 674.94686 | 654.50392 | 645.01353 | 643.51373 | 641.63216 | 622.46784 | 616.96902 | 601.97824 | 590.55765 | 585.1349  |
| 346.5 | 676.45725 | 655.88412 | 646.39941 | 644.90078 | 642.8049  | 623.82294 | 618.3102  | 602.73039 | 591.30314 | 585.83804 |
| 347   | 677.70373 | 656.99922 | 647.53275 | 646.09255 | 643.71098 | 624.90392 | 619.41863 | 603.27608 | 591.83804 | 586.3551  |
| 347.5 | 678.72804 | 657.84843 | 648.38314 | 647.04725 | 644.42137 | 625.73039 | 620.28431 | 603.58471 | 592.15745 | 586.67235 |
| 348   | 679.52157 | 658.46294 | 648.98431 | 647.73059 | 644.97137 | 626.34    | 620.90961 | 603.65275 | 592.27529 | 586.82196 |
| 348.5 | 680.1049  | 658.88451 | 649.38353 | 648.15373 | 645.30745 | 626.77157 | 621.2798  | 603.5051  | 592.17843 | 586.81627 |
| 349   | 680.4449  | 659.09686 | 649.62059 | 648.35    | 645.42294 | 626.99157 | 621.40804 | 603.16902 | 591.87118 | 586.62843 |
| 349.5 | 680.5749  | 659.09588 | 649.68765 | 648.35333 | 645.34255 | 626.9849  | 621.36627 | 602.66294 | 591.37804 | 586.24098 |
| 350   | 680.48824 | 658.88196 | 649.58608 | 648.18765 | 645.08784 | 626.78098 | 621.23784 | 601.98961 | 590.75941 | 585.69843 |
| 350.5 | 680.19373 | 658.49216 | 649.28353 | 647.86667 | 644.62882 | 626.42176 | 621.03529 | 601.14667 | 590       | 585.0351  |
| 351   | 679.66706 | 657.93686 | 648.79373 | 647.39118 | 643.98    | 625.92333 | 620.69686 | 600.13686 | 589.09725 | 584.19667 |
| 351.5 | 678.95745 | 657.21706 | 648.12333 | 646.74118 | 643.18902 | 625.28549 | 620.13824 | 598.98078 | 588.02471 | 583.16412 |
| 352   | 678.11706 | 656.32176 | 647.30373 | 645.91392 | 642.27431 | 624.51059 | 619.33431 | 597.68078 | 586.8198  | 581.96784 |
| 352.5 | 677.1551  | 655.23804 | 646.33059 | 644.89647 | 641.17961 | 623.57569 | 618.32333 | 596.2102  | 585.43529 | 580.68824 |
| 353   | 676.03863 | 653.97333 | 645.18588 | 643.70863 | 639.85235 | 622.43824 | 617.15059 | 594.5502  | 583.86627 | 579.27275 |
| 353.5 | 674.7102  | 652.51549 | 643.80412 | 642.34137 | 638.2951  | 621.11471 | 615.83078 | 592.73549 | 582.11471 | 577.68431 |
| 354   | 673.14765 | 650.84392 | 642.1902  | 640.79608 | 636.56059 | 619.64235 | 614.35373 | 590.81569 | 580.25843 | 575.89745 |
| 354.5 | 671.36039 | 648.96804 | 640.36608 | 639.04098 | 634.6851  | 618.02196 | 612.70431 | 588.80686 | 578.29216 | 573.99922 |
| 355   | 669.38647 | 646.95078 | 638.38706 | 637.09843 | 632.68255 | 616.18647 | 610.91216 | 586.63627 | 576.19098 | 571.97314 |
| 355.5 | 667.23235 | 644.83294 | 636.26588 | 634.98824 | 630.50882 | 614.12706 | 608.98784 | 584.2549  | 573.90059 | 569.80608 |
| 356   | 664.88569 | 642.57961 | 633.99824 | 632.73843 | 628.12863 | 611.87176 | 606.91667 | 581.67137 | 571.42922 | 567.44235 |
| 356.5 | 662.33216 | 640.10863 | 631.54255 | 630.31765 | 625.52843 | 609.48647 | 604.63451 | 578.95941 | 568.80157 | 564.90784 |
| 357   | 659.57686 | 637.39569 | 628.89176 | 627.72255 | 622.76078 | 606.98863 | 602.14922 | 576.15118 | 566.01745 | 562.20078 |

|       |           |           |           |           |           |           |           |           |           |           |
|-------|-----------|-----------|-----------|-----------|-----------|-----------|-----------|-----------|-----------|-----------|
| 357.5 | 656.67784 | 634.49    | 626.07196 | 624.96098 | 619.88314 | 604.35451 | 599.46549 | 573.22314 | 563.08137 | 559.37216 |
| 358   | 653.67314 | 631.44451 | 623.17137 | 622.08216 | 616.93647 | 601.5598  | 596.62863 | 570.13451 | 560.02431 | 556.42176 |
| 358.5 | 650.59608 | 628.26176 | 620.2102  | 619.08333 | 613.89098 | 598.59686 | 593.65863 | 566.86392 | 556.89451 | 553.36588 |
| 359   | 647.3798  | 624.93902 | 617.11725 | 615.94549 | 610.70431 | 595.49745 | 590.60549 | 563.4398  | 553.69471 | 550.19725 |
| 359.5 | 643.97588 | 621.46098 | 613.83    | 612.62451 | 607.36    | 592.29863 | 587.45549 | 559.92078 | 550.37922 | 546.94686 |
| 360   | 640.34784 | 617.85392 | 610.3649  | 609.12039 | 603.87961 | 588.99824 | 584.19333 | 556.35078 | 546.93804 | 543.63627 |
| 360.5 | 636.56176 | 614.13529 | 606.78392 | 605.45314 | 600.27333 | 585.56216 | 580.81412 | 552.69843 | 543.3949  | 540.2498  |
| 361   | 632.65569 | 610.33902 | 603.11039 | 601.66176 | 596.55275 | 581.97078 | 577.34549 | 548.94098 | 539.78647 | 536.76059 |
| 361.5 | 628.68686 | 606.44196 | 599.35    | 597.78922 | 592.72471 | 578.26745 | 573.80078 | 545.12275 | 536.11353 | 533.16078 |
| 362   | 624.65569 | 602.42549 | 595.50471 | 593.87843 | 588.79647 | 574.50824 | 570.17588 | 541.27686 | 532.37118 | 529.48196 |
| 362.5 | 620.54255 | 598.27078 | 591.61686 | 589.9298  | 584.79412 | 570.72824 | 566.44667 | 537.38333 | 528.52647 | 525.72412 |
| 363   | 616.28333 | 594.04137 | 587.66451 | 585.90431 | 580.74039 | 566.86314 | 562.62412 | 533.36451 | 524.56529 | 521.89471 |
| 363.5 | 611.84667 | 589.77608 | 583.58804 | 581.78353 | 576.64412 | 562.87961 | 558.72235 | 529.22804 | 520.50529 | 518.0002  |
| 364   | 607.28039 | 585.45588 | 579.35314 | 577.5802  | 572.44373 | 558.78333 | 554.77529 | 525.01824 | 516.39529 | 514.07706 |
| 364.5 | 602.66176 | 581.02706 | 575.02961 | 573.30686 | 568.12333 | 554.65216 | 550.7698  | 520.7902  | 512.24804 | 510.14353 |
| 365   | 598.02471 | 576.49824 | 570.67725 | 568.93882 | 563.71157 | 550.49765 | 546.66549 | 516.52882 | 508.05353 | 506.17196 |
| 365.5 | 593.33725 | 571.93627 | 566.30118 | 564.46882 | 559.28157 | 546.28431 | 542.4498  | 512.22176 | 503.81373 | 502.12529 |
| 366   | 588.59843 | 567.37961 | 561.83157 | 559.93647 | 554.82255 | 541.9649  | 538.18176 | 507.84569 | 499.53569 | 497.98353 |
| 366.5 | 583.84275 | 562.79098 | 557.26882 | 555.40471 | 550.31039 | 537.57157 | 533.90941 | 503.44667 | 495.2451  | 493.80176 |
| 367   | 579.08765 | 558.13333 | 552.6649  | 550.87667 | 545.73137 | 533.16176 | 529.64333 | 499.03294 | 490.95431 | 489.63137 |
| 367.5 | 574.29529 | 553.40569 | 548.06941 | 546.32098 | 541.11706 | 528.75137 | 525.36196 | 494.61549 | 486.65922 | 485.50902 |
| 368   | 569.44294 | 548.64373 | 543.46216 | 541.71314 | 536.49471 | 524.34059 | 521.06431 | 490.17745 | 482.35196 | 481.37549 |
| 368.5 | 564.58647 | 543.8651  | 538.82588 | 537.08784 | 531.88647 | 519.90961 | 516.77353 | 485.74235 | 478.04863 | 477.21039 |
| 369   | 559.78157 | 539.07078 | 534.16353 | 532.46333 | 527.28157 | 515.41863 | 512.46843 | 481.29431 | 473.76137 | 472.99059 |
| 369.5 | 555.03392 | 534.24922 | 529.49706 | 527.82118 | 522.68863 | 510.84549 | 508.11059 | 476.81196 | 469.50451 | 468.74941 |
| 370   | 550.27137 | 529.41078 | 524.8351  | 523.13863 | 518.08392 | 506.23471 | 503.69431 | 472.28098 | 465.24667 | 464.48294 |
| 370.5 | 545.45412 | 524.56039 | 520.17059 | 518.44078 | 513.45745 | 501.67569 | 499.26431 | 467.73882 | 460.98275 | 460.23667 |
| 371   | 540.57882 | 519.69882 | 515.5     | 513.74431 | 508.78118 | 497.17137 | 494.81627 | 463.23412 | 456.69098 | 456.00275 |
| 371.5 | 535.69647 | 514.83745 | 510.79451 | 509.02745 | 504.08314 | 492.68392 | 490.34686 | 458.77686 | 452.37333 | 451.77118 |
| 372   | 530.80686 | 509.98471 | 506.05039 | 504.2702  | 499.39098 | 488.15451 | 485.84039 | 454.34745 | 448.02059 | 447.50529 |
| 372.5 | 525.90196 | 505.17137 | 501.29078 | 499.50569 | 494.73078 | 483.61294 | 481.33961 | 449.8902  | 443.63804 | 443.22    |
| 373   | 520.92588 | 500.37667 | 496.53863 | 494.76137 | 490.06471 | 479.04412 | 476.85745 | 445.3802  | 439.22647 | 438.92098 |
| 373.5 | 515.89902 | 495.59    | 491.79098 | 490.02118 | 485.38882 | 474.47039 | 472.40863 | 440.8502  | 434.81098 | 434.61961 |
| 374   | 510.85216 | 490.8051  | 487.04588 | 485.25059 | 480.73431 | 469.9049  | 467.96588 | 436.34824 | 430.43118 | 430.33863 |
| 374.5 | 505.84059 | 486.03529 | 482.28608 | 480.47078 | 476.11196 | 465.36922 | 463.51471 | 431.88078 | 426.08353 | 426.09647 |
| 375   | 500.84686 | 481.24333 | 477.47569 | 475.69824 | 471.47843 | 460.82392 | 459.02725 | 427.41471 | 421.75098 | 421.86804 |
| 375.5 | 495.86549 | 476.40451 | 472.61275 | 470.92745 | 466.79196 | 456.22922 | 454.50431 | 422.93706 | 417.39902 | 417.57784 |
| 376   | 490.87745 | 471.53176 | 467.75255 | 466.14118 | 462.07294 | 451.60627 | 449.96804 | 418.46059 | 413.05196 | 413.22961 |
| 376.5 | 485.9098  | 466.66216 | 462.93098 | 461.35725 | 457.34647 | 446.98176 | 445.43373 | 413.97235 | 408.69471 | 408.89882 |
| 377   | 480.94922 | 461.78706 | 458.13745 | 456.58157 | 452.61647 | 442.36275 | 440.92843 | 409.4651  | 404.32451 | 404.64549 |
| 377.5 | 475.97745 | 456.8751  | 453.32235 | 451.79745 | 447.89706 | 437.6998  | 436.42529 | 404.94549 | 399.91549 | 400.43314 |
| 378   | 470.96667 | 451.94529 | 448.45902 | 446.9902  | 443.19431 | 433.01608 | 431.88804 | 400.47216 | 395.5202  | 396.18471 |
| 378.5 | 465.93706 | 447.01451 | 443.55078 | 442.16294 | 438.4751  | 428.34275 | 427.28922 | 396.02627 | 391.15451 | 391.88961 |
| 379   | 460.91686 | 442.09196 | 438.65314 | 437.32706 | 433.7049  | 423.70137 | 422.67529 | 391.59451 | 386.81725 | 387.58118 |

|              |           |           |           |           |           |           |           |           |           |           |
|--------------|-----------|-----------|-----------|-----------|-----------|-----------|-----------|-----------|-----------|-----------|
| <b>379.5</b> | 455.92765 | 437.16235 | 433.78784 | 432.48843 | 428.8851  | 419.05137 | 418.07392 | 387.12627 | 382.45431 | 383.29824 |
| <b>380</b>   | 450.9198  | 432.25118 | 428.9451  | 427.64882 | 424.08059 | 414.39549 | 413.48745 | 382.64412 | 378.09902 | 378.99765 |
| <b>380.5</b> | 445.86078 | 427.32608 | 424.08588 | 422.81333 | 419.31118 | 409.76333 | 408.86549 | 378.15431 | 373.77196 | 374.68961 |
| <b>381</b>   | 440.74667 | 422.35471 | 419.22784 | 417.99431 | 414.58176 | 405.17961 | 404.20863 | 373.69549 | 369.46863 | 370.38039 |
| <b>381.5</b> | 435.64784 | 417.3351  | 414.39882 | 413.21863 | 409.8751  | 400.61765 | 399.55784 | 369.27961 | 365.13686 | 366.12118 |
| <b>382</b>   | 430.61373 | 412.36529 | 409.61667 | 408.49137 | 405.19686 | 396.03627 | 394.96392 | 364.91373 | 360.78922 | 361.89431 |
| <b>382.5</b> | 425.66255 | 407.49039 | 404.85863 | 403.77902 | 400.52647 | 391.42725 | 390.42765 | 360.55843 | 356.48745 | 357.7051  |
| <b>383</b>   | 420.72373 | 402.68608 | 400.11745 | 399.05745 | 395.87353 | 386.84569 | 385.95451 | 356.19549 | 352.26961 | 353.5349  |
| <b>383.5</b> | 415.76882 | 397.86412 | 395.37196 | 394.32216 | 391.20765 | 382.33588 | 381.51667 | 351.82843 | 348.10745 | 349.40667 |
| <b>384</b>   | 410.8     | 393.01765 | 390.63667 | 389.60549 | 386.52059 | 377.90412 | 377.08333 | 347.49294 | 343.94373 | 345.30294 |
| <b>384.5</b> | 405.88118 | 388.17314 | 385.94216 | 384.92196 | 381.82588 | 373.49353 | 372.61118 | 343.20059 | 339.76039 | 341.22118 |
| <b>385</b>   | 401.02588 | 383.39529 | 381.29392 | 380.30627 | 377.18353 | 369.0602  | 368.13824 | 338.93804 | 335.57431 | 337.12922 |
| <b>385.5</b> | 396.24118 | 378.65784 | 376.68059 | 375.73647 | 372.62333 | 364.60314 | 363.70961 | 334.68118 | 331.42157 | 333.02549 |
| <b>386</b>   | 391.48392 | 373.94784 | 372.07824 | 371.19922 | 368.14353 | 360.1551  | 359.33627 | 330.44176 | 327.32216 | 328.93176 |
| <b>386.5</b> | 386.73804 | 369.23294 | 367.50118 | 366.67706 | 363.68529 | 355.73549 | 354.9849  | 326.22922 | 323.26451 | 324.90902 |
| <b>387</b>   | 381.96784 | 364.56431 | 362.94882 | 362.21784 | 359.25294 | 351.37353 | 350.66569 | 322.06039 | 319.23961 | 320.97471 |
| <b>387.5</b> | 377.22    | 359.96392 | 358.42882 | 357.81863 | 354.84647 | 347.07176 | 346.38118 | 317.95157 | 315.24529 | 317.09667 |
| <b>388</b>   | 372.5502  | 355.45098 | 353.92333 | 353.45039 | 350.47667 | 342.82314 | 342.12176 | 313.91471 | 311.29059 | 313.22176 |
| <b>388.5</b> | 367.98196 | 350.98667 | 349.4649  | 349.0698  | 346.10196 | 338.61255 | 337.8802  | 309.93    | 307.37235 | 309.34255 |
| <b>389</b>   | 363.46    | 346.54882 | 345.08608 | 344.70039 | 341.73569 | 334.42882 | 333.67078 | 305.97784 | 303.48235 | 305.48294 |
| <b>389.5</b> | 358.95431 | 342.13216 | 340.78176 | 340.36294 | 337.41863 | 330.26118 | 329.4998  | 302.04843 | 299.60294 | 301.65745 |
| <b>390</b>   | 354.47745 | 337.76804 | 336.51784 | 336.07    | 333.17961 | 326.09059 | 325.36706 | 298.14725 | 295.74725 | 297.84392 |
| <b>390.5</b> | 350.05627 | 333.46922 | 332.2598  | 331.81961 | 328.98451 | 321.91196 | 321.29118 | 294.25647 | 291.93647 | 294.06    |
| <b>391</b>   | 345.66667 | 329.21216 | 328.01157 | 327.62392 | 324.7949  | 317.7551  | 317.2851  | 290.37569 | 288.16804 | 290.32706 |
| <b>391.5</b> | 341.28529 | 324.95922 | 323.79902 | 323.47843 | 320.62824 | 313.68333 | 313.33725 | 286.5302  | 284.42941 | 286.67471 |
| <b>392</b>   | 336.90569 | 320.72    | 319.64941 | 319.3749  | 316.51255 | 309.70549 | 309.4002  | 282.7398  | 280.71686 | 283.05745 |
| <b>392.5</b> | 332.57725 | 316.52275 | 315.54686 | 315.31137 | 312.46    | 305.79451 | 305.45294 | 279.01353 | 277.05196 | 279.46412 |
| <b>393</b>   | 328.33275 | 312.39255 | 311.45196 | 311.27137 | 308.45314 | 301.90118 | 301.4749  | 275.32902 | 273.44059 | 275.8802  |
| <b>393.5</b> | 324.17412 | 308.30804 | 307.34882 | 307.25216 | 304.47627 | 298.02059 | 297.49275 | 271.66941 | 269.85804 | 272.34804 |
| <b>394</b>   | 320.01902 | 304.2598  | 303.27549 | 303.24667 | 300.50804 | 294.15941 | 293.54529 | 268.02471 | 266.28392 | 268.85196 |
| <b>394.5</b> | 315.82373 | 300.23588 | 299.27275 | 299.26941 | 296.56255 | 290.3502  | 289.68647 | 264.42569 | 262.73216 | 265.40137 |
| <b>395</b>   | 311.58941 | 296.23784 | 295.33745 | 295.31784 | 292.66471 | 286.59784 | 285.90784 | 260.88608 | 259.20098 | 261.97451 |
| <b>395.5</b> | 307.38059 | 292.2549  | 291.43118 | 291.3998  | 288.83196 | 282.88549 | 282.1798  | 257.40392 | 255.68941 | 258.57745 |
| <b>396</b>   | 303.22941 | 288.29098 | 287.5449  | 287.5149  | 285.04373 | 279.16412 | 278.46392 | 253.95392 | 252.18863 | 255.19    |
| <b>396.5</b> | 299.14196 | 284.34333 | 283.67843 | 283.67804 | 281.28255 | 275.42373 | 274.77922 | 250.50412 | 248.73137 | 251.82275 |
| <b>397</b>   | 295.11078 | 280.42078 | 279.85843 | 279.88902 | 277.55588 | 271.67314 | 271.12294 | 247.04275 | 245.32706 | 248.49255 |
| <b>397.5</b> | 291.13667 | 276.54451 | 276.0902  | 276.14431 | 273.86725 | 267.93961 | 267.49353 | 243.58765 | 241.98686 | 245.22    |
| <b>398</b>   | 287.21686 | 272.7251  | 272.36941 | 272.42745 | 270.19569 | 264.24725 | 263.8802  | 240.19431 | 238.68196 | 241.98373 |
| <b>398.5</b> | 283.3502  | 268.95275 | 268.67706 | 268.73196 | 266.52059 | 260.62922 | 260.31745 | 236.87686 | 235.40176 | 238.75941 |
| <b>399</b>   | 279.52706 | 265.20588 | 265.00686 | 265.06863 | 262.83588 | 257.07804 | 256.80451 | 233.60373 | 232.12373 | 235.53059 |
| <b>399.5</b> | 275.72804 | 261.46725 | 261.3551  | 261.4602  | 259.14667 | 253.56    | 253.33196 | 230.33    | 228.84843 | 232.29333 |
| <b>400</b>   | 271.9349  | 257.73078 | 257.72647 | 257.88902 | 255.46843 | 250.06725 | 249.87314 | 227.0549  | 225.59941 | 229.05667 |
| <b>400.5</b> | 268.15216 | 254.0251  | 254.13824 | 254.35059 | 251.81961 | 246.62647 | 246.43706 | 223.79078 | 222.38706 | 225.83608 |
| <b>401</b>   | 264.40529 | 250.38275 | 250.59275 | 250.85059 | 248.22569 | 243.24667 | 243.0202  | 220.55118 | 219.20078 | 222.67098 |



|       |           |           |           |           |           |           |           |           |           |           |
|-------|-----------|-----------|-----------|-----------|-----------|-----------|-----------|-----------|-----------|-----------|
| 401.5 | 260.71451 | 246.80255 | 247.08275 | 247.38745 | 244.70961 | 239.89549 | 239.60686 | 217.33275 | 216.01137 | 219.53686 |
| 402   | 257.05333 | 243.24431 | 243.59078 | 243.93294 | 241.27098 | 236.55176 | 236.19549 | 214.14275 | 212.85667 | 216.42    |
| 402.5 | 253.39412 | 239.69255 | 240.12373 | 240.48725 | 237.89725 | 233.22804 | 232.80235 | 210.98765 | 209.7751  | 213.3202  |
| 403   | 249.7398  | 236.18373 | 236.68059 | 237.08412 | 234.53922 | 229.95098 | 229.46882 | 207.86961 | 206.76216 | 210.28157 |
| 403.5 | 246.12039 | 232.74471 | 233.28706 | 233.72314 | 231.17098 | 226.71392 | 226.20353 | 204.77216 | 203.76392 | 207.30471 |
| 404   | 242.54392 | 229.36529 | 229.95824 | 230.39176 | 227.81412 | 223.49667 | 223.00314 | 201.69824 | 200.77098 | 204.37157 |
| 404.5 | 238.99863 | 226.00824 | 226.68843 | 227.08157 | 224.51765 | 220.27157 | 219.82882 | 198.66314 | 197.81588 | 201.45392 |
| 405   | 235.49216 | 222.66059 | 223.44882 | 223.83412 | 221.30255 | 217.05275 | 216.66196 | 195.68118 | 194.91471 | 198.54706 |
| 405.5 | 232.04745 | 219.33137 | 220.22333 | 220.65098 | 218.12549 | 213.85627 | 213.50706 | 192.75275 | 192.03392 | 195.6751  |
| 406   | 228.68255 | 216.05804 | 217.0302  | 217.50902 | 214.94608 | 210.70725 | 210.38686 | 189.87275 | 189.16745 | 192.84667 |
| 406.5 | 225.38608 | 212.86353 | 213.87588 | 214.39431 | 211.75667 | 207.60686 | 207.32078 | 187.0402  | 186.34824 | 190.07098 |
| 407   | 222.13176 | 209.72882 | 210.76765 | 211.31686 | 208.59431 | 204.57451 | 204.31078 | 184.23549 | 183.60235 | 187.31941 |
| 407.5 | 218.89824 | 206.61647 | 207.68667 | 208.28627 | 205.48176 | 201.60863 | 201.3551  | 181.45196 | 180.90686 | 184.60118 |
| 408   | 215.67804 | 203.51314 | 204.64059 | 205.29196 | 202.42627 | 198.69627 | 198.43216 | 178.68824 | 178.23647 | 181.92765 |
| 408.5 | 212.49745 | 200.43255 | 201.61922 | 202.32137 | 199.40569 | 195.80059 | 195.53451 | 175.96294 | 175.58353 | 179.3002  |
| 409   | 209.37549 | 197.40294 | 198.63196 | 199.37098 | 196.41804 | 192.92725 | 192.66706 | 173.2849  | 172.96353 | 176.69569 |
| 409.5 | 206.30765 | 194.43961 | 195.68255 | 196.47373 | 193.48333 | 190.10412 | 189.84627 | 170.65078 | 170.39314 | 174.10549 |
| 410   | 203.25157 | 191.54745 | 192.77412 | 193.64706 | 190.61922 | 187.34922 | 187.0702  | 168.05392 | 167.86059 | 171.54941 |
| 410.5 | 200.21098 | 188.6949  | 189.91824 | 190.88333 | 187.81098 | 184.63706 | 184.32784 | 165.50059 | 165.35098 | 169.05667 |
| 411   | 197.21529 | 185.87588 | 187.11745 | 188.16647 | 185.03706 | 181.95667 | 181.61373 | 163.00824 | 162.84667 | 166.63706 |
| 411.5 | 194.30333 | 183.08275 | 184.3798  | 185.49333 | 182.2949  | 179.32118 | 178.92765 | 160.57078 | 160.36412 | 164.27196 |
| 412   | 191.46314 | 180.34176 | 181.69392 | 182.86039 | 179.61    | 176.75353 | 176.27039 | 158.18882 | 157.93137 | 161.92431 |
| 412.5 | 188.68196 | 177.64706 | 179.05588 | 180.2449  | 176.96137 | 174.23353 | 173.64725 | 155.8449  | 155.56118 | 159.58392 |
| 413   | 185.93353 | 175.00608 | 176.46137 | 177.63686 | 174.35412 | 171.73627 | 171.06863 | 153.51686 | 153.22588 | 157.26863 |
| 413.5 | 183.21569 | 172.42529 | 173.91647 | 175.07078 | 171.78804 | 169.25059 | 168.55196 | 151.18824 | 150.92608 | 155.01745 |
| 414   | 180.5298  | 169.90157 | 171.4202  | 172.57549 | 169.30039 | 166.80549 | 166.10314 | 148.88471 | 148.68784 | 152.83647 |
| 414.5 | 177.91    | 167.42804 | 168.96216 | 170.14765 | 166.86451 | 164.41784 | 163.71961 | 146.64451 | 146.52235 | 150.71667 |
| 415   | 175.35471 | 165.00902 | 166.54431 | 167.76902 | 164.46    | 162.08824 | 161.38686 | 144.47225 | 144.4051  | 148.63255 |
| 415.5 | 172.84843 | 162.65373 | 164.16255 | 165.43157 | 162.07137 | 159.80353 | 159.09314 | 142.34892 | 142.30441 | 146.5749  |
| 416   | 170.37353 | 160.33353 | 161.82882 | 163.14098 | 159.73235 | 157.57333 | 156.83471 | 140.26937 | 140.22676 | 144.53804 |
| 416.5 | 167.95314 | 158.03863 | 159.54765 | 160.89941 | 157.46196 | 155.40647 | 154.61235 | 138.2448  | 138.20043 | 142.53467 |
| 417   | 165.59647 | 155.78451 | 157.31843 | 158.69059 | 155.2649  | 153.27    | 152.41451 | 136.25931 | 136.23753 | 140.55922 |
| 417.5 | 163.29961 | 153.59725 | 155.12078 | 156.50647 | 153.12157 | 151.13118 | 150.24294 | 134.29227 | 134.32384 | 138.61684 |
| 418   | 161.04824 | 151.46    | 152.94843 | 154.36176 | 151.00255 | 148.98451 | 148.11235 | 132.33969 | 132.42576 | 136.7058  |
| 418.5 | 158.84431 | 149.3498  | 150.8202  | 152.26333 | 148.89608 | 146.87824 | 146.05373 | 130.4121  | 130.52875 | 134.84327 |
| 419   | 156.68059 | 147.25902 | 148.76275 | 150.20686 | 146.81157 | 144.83471 | 144.06367 | 128.51984 | 128.6508  | 133.0152  |
| 419.5 | 154.56843 | 145.20784 | 146.76667 | 148.19588 | 144.76353 | 142.86063 | 142.11759 | 126.66967 | 126.81692 | 131.21908 |
| 420   | 152.50706 | 143.20392 | 144.80824 | 146.24686 | 142.75912 | 140.92855 | 140.17925 | 124.85063 | 125.03339 | 129.43592 |
| 420.5 | 150.49627 | 141.25143 | 142.86843 | 144.36098 | 140.7892  | 139.02973 | 138.25004 | 123.05125 | 123.30376 | 127.67555 |
| 421   | 148.52059 | 139.33329 | 140.96341 | 142.51647 | 138.84982 | 137.15092 | 136.34129 | 121.273   | 121.62216 | 125.9429  |
| 421.5 | 146.56627 | 137.44551 | 139.09537 | 140.68843 | 136.94447 | 135.30053 | 134.47575 | 119.53749 | 119.98076 | 124.24863 |
| 422   | 144.62529 | 135.59204 | 137.26455 | 138.87029 | 135.07425 | 133.48382 | 132.65188 | 117.8588  | 118.36578 | 122.5898  |
| 422.5 | 142.69378 | 133.78276 | 135.44576 | 137.05775 | 133.22902 | 131.69967 | 130.86884 | 116.22686 | 116.77718 | 120.95192 |
| 423   | 140.7781  | 131.99424 | 133.63624 | 135.25408 | 131.40261 | 129.94849 | 129.10675 | 114.61763 | 115.20618 | 119.32269 |

|       |           |           |           |           |           |           |           |           |           |           |
|-------|-----------|-----------|-----------|-----------|-----------|-----------|-----------|-----------|-----------|-----------|
| 423.5 | 138.87963 | 130.20524 | 131.83051 | 133.47218 | 129.60643 | 128.22463 | 127.36108 | 113.02202 | 113.64706 | 117.71953 |
| 424   | 137.01727 | 128.42304 | 130.03012 | 131.71633 | 127.8572  | 126.52316 | 125.63022 | 111.451   | 112.09361 | 116.15512 |
| 424.5 | 135.18476 | 126.66627 | 128.25571 | 129.9821  | 126.15655 | 124.83853 | 123.92255 | 109.90667 | 110.56625 | 114.61425 |
| 425   | 133.39375 | 124.92469 | 126.53116 | 128.26551 | 124.48878 | 123.18229 | 122.2411  | 108.39329 | 109.07235 | 113.08227 |
| 425.5 | 131.63941 | 123.18504 | 124.85184 | 126.58104 | 122.84647 | 121.54712 | 120.59822 | 106.90116 | 107.61678 | 111.57829 |
| 426   | 129.9258  | 121.45559 | 123.19584 | 124.92755 | 121.23061 | 119.92325 | 118.98686 | 105.43359 | 106.18904 | 110.12892 |
| 426.5 | 128.23394 | 119.76757 | 121.5709  | 123.31216 | 119.63596 | 118.30514 | 117.40061 | 103.98973 | 104.78339 | 108.73075 |
| 427   | 126.55871 | 118.12737 | 119.99445 | 121.72667 | 118.0498  | 116.70527 | 115.83724 | 102.57073 | 103.4088  | 107.35998 |
| 427.5 | 124.89924 | 116.52241 | 118.46275 | 120.16253 | 116.45641 | 115.13265 | 114.30435 | 101.17094 | 102.05884 | 105.99906 |
| 428   | 123.26784 | 114.93259 | 116.94424 | 118.60724 | 114.84873 | 113.58114 | 112.79578 | 99.79082  | 100.73173 | 104.63845 |
| 428.5 | 121.65451 | 113.35667 | 115.42869 | 117.06543 | 113.23649 | 112.0562  | 111.29137 | 98.44584  | 99.42331  | 103.26588 |
| 429   | 120.04482 | 111.79435 | 113.90657 | 115.56488 | 111.65041 | 110.56204 | 109.78502 | 97.13347  | 98.13925  | 101.88771 |
| 429.5 | 118.44469 | 110.26453 | 112.377   | 114.10959 | 110.11908 | 109.10324 | 108.295   | 95.84224  | 96.8558   | 100.52522 |
| 430   | 116.87718 | 108.77978 | 110.86088 | 112.68159 | 108.63139 | 107.67678 | 106.84531 | 94.54031  | 95.55886  | 99.19304  |
| 430.5 | 115.34178 | 107.34514 | 109.39151 | 111.23802 | 107.1611  | 106.29543 | 105.44312 | 93.23118  | 94.25833  | 97.89369  |
| 431   | 113.82494 | 105.94169 | 107.96663 | 109.80108 | 105.69622 | 104.94853 | 104.07165 | 91.92878  | 92.9839   | 96.61316  |
| 431.5 | 112.30473 | 104.55314 | 106.55086 | 108.39288 | 104.25692 | 103.61078 | 102.70784 | 90.66869  | 91.73861  | 95.34753  |
| 432   | 110.79796 | 103.16863 | 105.1298  | 107.03059 | 102.85955 | 102.2539  | 101.33941 | 89.43845  | 90.51498  | 94.08659  |
| 432.5 | 109.31806 | 101.80041 | 103.71667 | 105.67976 | 101.50549 | 100.89249 | 99.97824  | 88.22541  | 89.31437  | 92.83888  |
| 433   | 107.87673 | 100.45651 | 102.34124 | 104.3199  | 100.173   | 99.54924  | 98.64145  | 87.009    | 88.13761  | 91.61567  |
| 433.5 | 106.45539 | 99.13776  | 101.00494 | 102.95255 | 98.85029  | 98.23986  | 97.33359  | 85.81455  | 86.97445  | 90.42133  |
| 434   | 105.04422 | 97.83398  | 99.70486  | 101.60369 | 97.53935  | 96.95551  | 96.03704  | 84.66024  | 85.81406  | 89.2538   |
| 434.5 | 103.63378 | 96.54473  | 98.42924  | 100.28673 | 96.24847  | 95.68653  | 94.74176  | 83.54231  | 84.66002  | 88.10196  |
| 435   | 102.2432  | 95.27082  | 97.16884  | 99.00773  | 94.98065  | 94.42655  | 93.46204  | 82.43224  | 83.51876  | 86.96763  |
| 435.5 | 100.89486 | 94.00961  | 95.92104  | 97.75886  | 93.72522  | 93.1799   | 92.21967  | 81.31849  | 82.40931  | 85.84941  |
| 436   | 99.59476  | 92.76143  | 94.69551  | 96.52082  | 92.48039  | 91.95657  | 91.01788  | 80.20278  | 81.33284  | 84.75251  |
| 436.5 | 98.32349  | 91.54145  | 93.4911   | 95.27733  | 91.25176  | 90.74765  | 89.84147  | 79.09067  | 80.28406  | 83.67365  |
| 437   | 97.05969  | 90.35929  | 92.29414  | 94.04122  | 90.04822  | 89.54935  | 88.68776  | 78.00239  | 79.24331  | 82.61108  |
| 437.5 | 95.80229  | 89.20576  | 91.09435  | 92.83892  | 88.86627  | 88.36225  | 87.55725  | 76.9502   | 78.20563  | 81.56284  |
| 438   | 94.55853  | 88.05969  | 89.91529  | 91.68886  | 87.71282  | 87.19712  | 86.435    | 75.93057  | 77.16892  | 80.52955  |
| 438.5 | 93.33463  | 86.91522  | 88.76867  | 90.57229  | 86.57302  | 86.05496  | 85.30845  | 74.92425  | 76.1512   | 79.52649  |
| 439   | 92.12329  | 85.77671  | 87.65339  | 89.45065  | 85.43588  | 84.93529  | 84.18788  | 73.92461  | 75.15573  | 78.54653  |
| 439.5 | 90.92275  | 84.66261  | 86.54278  | 88.31075  | 84.29743  | 83.83186  | 83.08029  | 72.93733  | 74.18049  | 77.57651  |
| 440   | 89.73475  | 83.58335  | 85.44324  | 87.17633  | 83.18071  | 82.7381   | 81.99271  | 71.96729  | 73.21696  | 76.59296  |
| 440.5 | 88.56941  | 82.52871  | 84.35318  | 86.06     | 82.09614  | 81.6571   | 80.92257  | 71.01057  | 72.26902  | 75.61049  |
| 441   | 87.44371  | 81.47147  | 83.28194  | 84.95945  | 81.04129  | 80.59857  | 79.86984  | 70.07206  | 71.3359   | 74.64918  |
| 441.5 | 86.36206  | 80.41659  | 82.22871  | 83.86371  | 80.00749  | 79.56325  | 78.82216  | 69.15888  | 70.41014  | 73.72486  |
| 442   | 85.30927  | 79.38508  | 81.20424  | 82.79135  | 78.99067  | 78.54282  | 77.78939  | 68.27173  | 69.48427  | 72.82482  |
| 442.5 | 84.25945  | 78.39396  | 80.20725  | 81.75702  | 77.98408  | 77.53949  | 76.79016  | 67.399    | 68.56847  | 71.94373  |
| 443   | 83.207    | 77.42539  | 79.23161  | 80.75631  | 76.98039  | 76.57178  | 75.83878  | 66.53714  | 67.67151  | 71.07684  |
| 443.5 | 82.15345  | 76.46875  | 78.27298  | 79.75718  | 75.98782  | 75.63678  | 74.90912  | 65.68488  | 66.80088  | 70.21635  |
| 444   | 81.09525  | 75.51163  | 77.33045  | 78.77147  | 75.01982  | 74.71824  | 73.97651  | 64.85484  | 65.95535  | 69.34141  |
| 444.5 | 80.02906  | 74.56176  | 76.40167  | 77.81155  | 74.0738   | 73.79741  | 73.03984  | 64.04237  | 65.13275  | 68.45502  |
| 445   | 78.96659  | 73.61525  | 75.47984  | 76.88241  | 73.14669  | 72.87853  | 72.11235  | 63.23012  | 64.32198  | 67.57998  |



|             |        |         |        |        |         |       |       |        |        |
|-------------|--------|---------|--------|--------|---------|-------|-------|--------|--------|
| <b>1.12</b> | 0      | 0       | 0      | 0      | 0       | 0     | 0     | 0      | 0      |
| <b>1.29</b> | 0      | 0       | 0      | 0      | 0       | 0     | 0     | 0      | 0      |
| <b>1.5</b>  | 0      | 0       | 0      | 0      | 0       | 0     | 0     | 0      | 0      |
| <b>1.74</b> | 4.09   | 0       | 0      | 0      | 0       | 0     | 0     | 0      | 0      |
| <b>2.01</b> | 15.2   | 0       | 0      | 0      | 0       | 0     | 0     | 0      | 0      |
| <b>2.33</b> | 23.2   | 0       | 0      | 0      | 0       | 0     | 0     | 0      | 0      |
| <b>2.7</b>  | 19.8   | 0       | 0      | 0      | 0       | 0     | 0     | 0      | 0      |
| <b>3.12</b> | 11.4   | 0       | 0      | 0      | 0       | 0     | 0     | 0      | 0      |
| <b>3.62</b> | 5.63   | 0       | 0      | 0      | 0       | 0     | 0     | 0      | 0      |
| <b>4.19</b> | 3.18   | 6.29    | 0      | 0      | 0       | 0     | 0     | 0      | 0      |
| <b>4.85</b> | 2.19   | 19.6    | 0.106  | 0      | 0       | 0     | 0     | 0      | 0      |
| <b>5.61</b> | 1.6    | 24.4    | 6.05   | 0      | 0       | 0     | 0     | 0      | 0      |
| <b>6.5</b>  | 1.32   | 16.4    | 19     | 5.66   | 0       | 0     | 0     | 0      | 0      |
| <b>7.53</b> | 1.16   | 7.52    | 25.4   | 23.8   | 4.35    | 0.528 | 0     | 0      | 0      |
| <b>8.72</b> | 0.96   | 3.87    | 20.2   | 30.9   | 16      | 14    | 3.7   | 0      | 0      |
| <b>10.1</b> | 0.83   | 0.97    | 11.7   | 25.1   | 25.2    | 36.1  | 16.8  | 0      | 0      |
| <b>11.7</b> | 0.54   | 0.62    | 5.77   | 6.37   | 23.3    | 34    | 30.5  | 4.12   | 0      |
| <b>13.5</b> | 0.31   | 0.47    | 3.07   | 0.0646 | 14.9    | 13.2  | 28.7  | 18.3   | 6.76   |
| <b>15.7</b> | 0.16   | 0.35    | 2.27   | 0      | 7.34    | 1.79  | 15.1  | 31.9   | 22.8   |
| <b>18.2</b> | 0.0697 | 0.25    | 2.01   | 0      | 3.25    | 0     | 4.27  | 28     | 31.4   |
| <b>21</b>   | 0.0364 | 0.13    | 1.67   | 0      | 1.72    | 0     | 0.459 | 12.8   | 23.6   |
| <b>24.4</b> | 0.0201 | 0.098   | 1.17   | 0.0845 | 1.23    | 0     | 0     | 2.55   | 10.7   |
| <b>28.2</b> | 0.0188 | 0.061   | 0.66   | 0.355  | 0.902   | 0     | 0     | 0      | 2.75   |
| <b>32.7</b> | 0      | 0.0599  | 0.283  | 0.578  | 0.547   | 0     | 0     | 0      | 0.293  |
| <b>37.8</b> | 0      | 0.0549  | 0.0813 | 0.453  | 0.247   | 0     | 0     | 0      | 0.0609 |
| <b>43.8</b> | 0      | 0.0474  | 0.0115 | 0.169  | 0.0731  | 0     | 0     | 0      | 0.226  |
| <b>50.7</b> | 0      | 0.0323  | 0      | 0.0233 | 0.0106  | 0     | 0     | 0.0638 | 0.354  |
| <b>58.8</b> | 0      | 0.0151  | 0      | 0      | 0.00609 | 0     | 0     | 0.249  | 0.31   |
| <b>68.1</b> | 0      | 0.00402 | 0      | 0      | 0.0262  | 0     | 0     | 0.423  | 0.164  |
| <b>78.8</b> | 0      | 0.00182 | 0      | 0      | 0.0526  | 0     | 0     | 0.429  | 0.0493 |

|             |         |         |         |         |        |         |         |         |         |
|-------------|---------|---------|---------|---------|--------|---------|---------|---------|---------|
| <b>913</b>  | 0.00699 | 0.00651 | 0.00753 | 0       | 0.0699 | 0.00353 | 0       | 0.298   | 0.0187  |
| <b>106</b>  | 0.00364 | 0.0141  | 0.0315  | 0.0114  | 0.0731 | 0.0227  | 0.00206 | 0.146   | 0.0457  |
| <b>122</b>  | 0.00828 | 0.0212  | 0.0622  | 0.0529  | 0.0671 | 0.0549  | 0.0207  | 0.0466  | 0.0813  |
| <b>142</b>  | 0.0126  | 0.026   | 0.0829  | 0.106   | 0.0589 | 0.0721  | 0.0612  | 0.00738 | 0.0955  |
| <b>164</b>  | 0.0152  | 0.028   | 0.0879  | 0.123   | 0.053  | 0.0614  | 0.0924  | 0.00123 | 0.0846  |
| <b>190</b>  | 0.016   | 0.0282  | 0.0802  | 0.0906  | 0.0508 | 0.0371  | 0.0887  | 0.00884 | 0.0603  |
| <b>220</b>  | 0.0159  | 0.0275  | 0.0653  | 0.0404  | 0.0518 | 0.015   | 0.0583  | 0.0264  | 0.0361  |
| <b>255</b>  | 0.0156  | 0.0274  | 0.048   | 0.00828 | 0.0556 | 0.00303 | 0.0242  | 0.0482  | 0.0196  |
| <b>295</b>  | 0.0149  | 0.0269  | 0.0296  | 0       | 0.0629 | 0.00309 | 0.00471 | 0.0668  | 0.0121  |
| <b>342</b>  | 0.0123  | 0.0231  | 0.0123  | 0       | 0.0696 | 0.0133  | 0       | 0.0804  | 0.0109  |
| <b>396</b>  | 0.00789 | 0.0159  | 0.00236 | 0       | 0.0652 | 0.0253  | 0       | 0.0923  | 0.0126  |
| <b>459</b>  | 0.00357 | 0.00818 | 0       | 0       | 0.0463 | 0.0278  | 0       | 0.0997  | 0.0148  |
| <b>531</b>  | 9.17E-4 | 0.00272 | 0       | 0       | 0.0217 | 0.0173  | 0       | 0.0913  | 0.0163  |
| <b>615</b>  | 7.72E-5 | 4.31E-4 | 0       | 0       | 0.0048 | 0.00466 | 0       | 0.0656  | 0.0152  |
| <b>712</b>  | 0       | 0       | 0       | 0       | 0      | 0       | 0       | 0.0346  | 0.0102  |
| <b>825</b>  | 0       | 0       | 0       | 0       | 0      | 0       | 0       | 0.0116  | 0.00406 |
| <b>955</b>  | 0       | 0       | 0       | 0       | 0      | 0       | 0       | 0.00182 | 6.97E-4 |
| <b>1110</b> | 0       | 0       | 0       | 0       | 0      | 0       | 0       | 0       | 0       |
| <b>1280</b> | 0       | 0       | 0       | 0       | 0      | 0       | 0       | 0       | 0       |
| <b>1480</b> | 0       | 0       | 0       | 0       | 0      | 0       | 0       | 0       | 0       |
| <b>1720</b> | 0       | 0       | 0       | 0       | 0      | 0       | 0       | 0       | 0       |
| <b>1990</b> | 0       | 0       | 0       | 0       | 0      | 0       | 0       | 0       | 0       |
| <b>2300</b> | 0       | 0       | 0       | 0       | 0      | 0       | 0       | 0       | 0       |
| <b>2670</b> | 0       | 0       | 0       | 0       | 0      | 0       | 0       | 0       | 0       |
| <b>3090</b> | 0       | 0       | 0       | 0       | 0      | 0       | 0       | 0       | 0       |
| <b>3580</b> | 0       | 2.17E-4 | 0       | 0       | 0      | 0       | 0       | 0       | 0       |
| <b>4150</b> | 0       | 0.00224 | 0       | 0       | 0      | 0       | 0       | 0       | 0       |
| <b>4800</b> | 0       | 0.00933 | 0       | 0       | 0      | 0       | 0       | 0       | 0       |
| <b>5560</b> | 0       | 0.0128  | 0       | 0       | 0      | 0       | 0       | 0       | 0       |
| <b>6440</b> | 0       | 0.0055  | 0       | 0       | 0      | 0       | 0       | 0       | 0       |

|      |                   |                   |                          |                           |                          |                           |                           |                            |                           |                            |
|------|-------------------|-------------------|--------------------------|---------------------------|--------------------------|---------------------------|---------------------------|----------------------------|---------------------------|----------------------------|
| 7460 | 0                 | 0                 | 0                        | 0                         | 0                        | 0                         | 0                         | 0                          | 0                         |                            |
| 8630 | 0                 | 0                 | 0                        | 0                         | 0                        | 0                         | 0                         | 0                          | 0                         |                            |
|      |                   |                   |                          |                           |                          |                           |                           |                            |                           |                            |
|      | 0wks<br>33%<br>RH | 0wks7<br>4%<br>RH | 6wks<br>4°C<br>33%<br>RH | 6wks<br>37°C<br>33%<br>RH | 6wks<br>4°C<br>74%<br>RH | 6wks<br>37°C<br>74%<br>RH | 10wks<br>4°C<br>33%<br>RH | 10wks<br>37°C<br>33%<br>RH | 10wks<br>4°C<br>74%<br>RH | 10wks<br>37°C<br>74%<br>RH |
| 0    | 0                 | 0                 | 0                        | 0                         | 0                        | 0                         | 0                         | 0                          | 0                         | 0                          |
| 0    | 0                 | 0                 | 0                        | 0                         | 0                        | 0                         | 0                         | 0                          | 0                         | 0                          |
| 0    | 0                 | 0                 | 0                        | 0                         | 0                        | 0                         | 0                         | 0                          | 0                         | 0                          |
| 0    | 0                 | 0                 | 0                        | 0                         | 0                        | 0                         | 0                         | 0                          | 0                         | 0                          |
| 0    | 0                 | 0                 | 0                        | 0                         | 0                        | 0                         | 0                         | 0                          | 0                         | 0                          |
| 0    | 0                 | 0                 | 0                        | 0                         | 0                        | 0                         | 0                         | 0                          | 0                         | 0                          |
| 0    | 0                 | 0                 | 0                        | 0                         | 0                        | 0                         | 0                         | 0                          | 0                         | 0                          |
| 0    | 0                 | 0                 | 0                        | 0                         | 0                        | 0                         | 0                         | 0                          | 0                         | 0                          |
| 0    | 0                 | 0                 | 0                        | 0                         | 0                        | 0                         | 0                         | 0                          | 0                         | 0                          |
| 0    | 0                 | 0                 | 0                        | 0                         | 0                        | 0                         | 0                         | 0                          | 0                         | 0                          |
| 0    | 0                 | 0                 | 0                        | 0                         | 0                        | 0                         | 0                         | 0                          | 0                         | 0                          |
| 0    | 0                 | 0                 | 0                        | 0                         | 0                        | 0                         | 0                         | 0                          | 0                         | 0                          |
| 0    | 0                 | 0                 | 0                        | 0                         | 0                        | 0                         | 0                         | 0                          | 0                         | 0                          |
| 0    | 0                 | 0                 | 0                        | 0                         | 0                        | 0                         | 0                         | 0                          | 0                         | 0                          |
| 0    | 0                 | 0                 | 0                        | 0                         | 0                        | 0                         | 0                         | 0                          | 0                         | 0                          |
| 0    | 0                 | 0                 | 0                        | 0                         | 0                        | 0                         | 0                         | 0                          | 0                         | 0                          |
| 0    | 0                 | 0                 | 0                        | 0                         | 0                        | 0                         | 0                         | 0                          | 0                         | 0                          |
| 0    | 0                 | 0                 | 0                        | 0                         | 0                        | 0                         | 0                         | 0                          | 0                         | 0                          |
| 0    | 0                 | 0                 | 0                        | 0                         | 0                        | 0                         | 0                         | 0                          | 0                         | 0                          |
| 0    | 0                 | 0                 | 0                        | 0                         | 0                        | 0                         | 0                         | 0                          | 0                         | 0                          |
| 0    | 0                 | 0                 | 0                        | 0                         | 0                        | 0                         | 0                         | 0                          | 0                         | 0                          |
| 0    | 0                 | 0                 | 0                        | 0                         | 0                        | 0                         | 0                         | 0                          | 0                         | 0                          |
| 0    | 0                 | 0                 | 0                        | 0                         | 0                        | 0                         | 0                         | 0                          | 0                         | 0                          |
| 0    | 0                 | 0                 | 0                        | 0                         | 0                        | 0                         | 0                         | 0                          | 0                         | 0                          |
| 0    | 0                 | 0                 | 0                        | 0                         | 0                        | 0                         | 0                         | 0                          | 0                         | 0                          |
| 0    | 0                 | 0                 | 0                        | 0                         | 0                        | 0                         | 0                         | 0                          | 0                         | 0                          |
| 0    | 0                 | 0                 | 0                        | 0                         | 0                        | 0                         | 0                         | 0                          | 0                         | 0                          |
| 0    | 0                 | 0                 | 0                        | 0                         | 0                        | 0                         | 0                         | 0                          | 0                         | 0                          |
| 0    | 0                 | 0                 | 0                        | 0                         | 0                        | 0                         | 0                         | 0                          | 0                         | 0                          |
| 0    | 0                 | 0                 | 0                        | 0                         | 0                        | 0                         | 0                         | 0                          | 0                         | 0                          |
| 0    | 0                 | 0                 | 0                        | 0                         | 0                        | 0                         | 0                         | 0                          | 0                         | 0                          |
| 0    | 0                 | 0                 | 0                        | 0                         | 0                        | 0                         | 0                         | 0                          | 0                         | 0                          |
| 0    | 0                 | 0                 | 0                        | 0                         | 0                        | 0                         | 0                         | 0                          | 0                         | 0                          |
| 0    | 0                 | 0                 | 0                        | 0                         | 0                        | 0                         | 0                         | 0                          | 0                         | 0                          |
| 0    | 0                 | 0                 | 0                        | 0                         | 0                        | 0                         | 0                         | 0                          | 0                         | 0                          |
| 0    | 0                 | 0                 | 0                        | 0                         | 0                        | 0                         | 0                         | 0                          | 0                         | 0                          |
| 0    | 0                 | 0                 | 0                        | 0                         | 0                        | 0                         | 0                         | 0                          | 0                         | 0                          |
| 0    | 0                 | 0                 | 0                        | 0                         | 0                        | 0                         | 0                         | 0                          | 0                         | 0                          |
| 0    | 0                 | 0                 | 0                        | 0                         | 0                        | 0                         | 0                         | 0                          | 0                         | 0                          |
| 0    | 0                 | 0                 | 0                        | 0                         | 0                        | 0                         | 0                         | 0                          | 0                         | 0                          |
| 0    | 0                 | 0                 | 0                        | 0                         | 0                        | 0                         | 0                         | 0                          | 0                         | 0                          |
| 0    | 0                 | 0                 | 0                        | 0                         | 0                        | 0                         | 0                         | 0                          | 0                         | 0                          |
| 0    | 0                 | 0                 | 0                        | 0                         | 0                        | 0                         | 0                         | 0                          | 0                         | 0                          |
| 0    | 0                 | 0                 | 0                        | 0                         | 0                        | 0                         | 0                         | 0                          | 0                         | 0                          |
| 0    | 0                 | 0                 | 0                        | 0                         | 0                        | 0                         | 0                         | 0                          | 0                         | 0                          |
| 0    | 0                 | 0                 | 0                        | 0                         | 0                        | 0                         | 0                         | 0                          | 0                         | 0                          |
| 0    | 0                 | 0                 | 0                        | 0                         | 0                        | 0                         | 0                         | 0                          | 0                         | 0                          |
| 0    | 0                 | 0                 | 0                        | 0                         | 0                        | 0                         | 0                         | 0                          | 0                         | 0                          |
| 0    | 0                 | 0                 | 0                        | 0                         | 0                        | 0                         | 0                         | 0                          | 0                         | 0                          |
| 0    | 0                 | 0                 | 0                        | 0                         | 0                        | 0                         | 0                         | 0                          | 0                         | 0                          |
| 0    | 0                 | 0                 | 0                        | 0                         | 0                        | 0                         | 0                         | 0                          | 0                         | 0                          |
| 0    | 0                 | 0                 | 0                        | 0                         | 0                        | 0                         | 0                         | 0                          | 0                         | 0                          |
| 0    | 0                 | 0                 | 0                        | 0                         | 0                        | 0                         | 0                         | 0                          | 0                         | 0                          |
| 0    | 0                 | 0                 | 0                        | 0                         | 0                        | 0                         | 0                         | 0                          | 0                         | 0                          |
| 0    | 0                 | 0                 | 0                        | 0                         | 0                        | 0                         | 0                         | 0                          | 0                         | 0                          |
| 0    | 0                 | 0                 | 0                        | 0                         | 0                        | 0                         | 0                         | 0                          | 0                         | 0                          |
| 0    | 0                 | 0                 | 0                        | 0                         | 0                        | 0                         | 0                         | 0                          | 0                         | 0                          |
| 0    | 0                 | 0                 | 0                        | 0                         | 0                        | 0                         | 0                         | 0                          | 0                         | 0                          |
| 0    | 0                 | 0                 | 0                        | 0                         | 0                        | 0                         | 0                         | 0                          | 0                         | 0                          |
| 0    | 0                 | 0                 | 0                        | 0                         | 0                        | 0                         | 0                         | 0                          | 0                         | 0                          |
| 0    | 0                 | 0                 | 0                        | 0                         | 0                        | 0                         | 0                         | 0                          | 0                         | 0                          |
| 0    | 0                 | 0                 | 0                        | 0                         | 0                        | 0                         | 0                         | 0                          | 0                         | 0                          |
| 0    | 0                 | 0                 | 0                        | 0                         | 0                        | 0                         | 0                         | 0                          | 0                         | 0                          |
| 0    | 0                 | 0                 | 0                        | 0                         | 0                        | 0                         | 0                         | 0                          | 0                         | 0                          |
| 0    | 0                 | 0                 | 0                        | 0                         | 0                        | 0                         | 0                         | 0                          | 0                         | 0                          |
| 0    | 0                 | 0                 | 0                        | 0                         | 0                        | 0                         | 0                         | 0                          | 0                         | 0                          |
| 0    | 0                 | 0                 | 0                        | 0                         | 0                        | 0                         | 0                         | 0                          | 0                         | 0                          |
| 0    | 0                 | 0                 | 0                        | 0                         | 0                        | 0                         | 0                         | 0                          | 0                         | 0                          |
| 0    | 0                 | 0                 | 0                        | 0                         | 0                        | 0                         | 0                         | 0                          | 0                         | 0                          |
| 0    | 0                 | 0                 | 0                        | 0                         | 0                        | 0                         | 0                         | 0                          | 0                         | 0                          |
| 0    | 0                 | 0                 | 0                        | 0                         | 0                        | 0                         | 0                         | 0                          | 0                         | 0                          |
| 0    | 0                 | 0                 | 0                        | 0                         | 0                        | 0                         | 0                         | 0                          | 0                         | 0                          |
| 0    | 0                 | 0                 | 0                        | 0                         | 0                        | 0                         | 0                         | 0                          | 0                         | 0                          |
| 0    | 0                 | 0                 | 0                        | 0                         | 0                        | 0                         | 0                         | 0                          | 0                         | 0                          |
| 0    | 0                 | 0                 | 0                        | 0                         | 0                        | 0                         | 0                         | 0                          | 0                         | 0                          |
| 0    | 0                 | 0                 | 0                        | 0                         | 0                        | 0                         | 0                         | 0                          | 0                         | 0                          |
| 0    | 0                 | 0                 | 0                        | 0                         | 0                        | 0                         | 0                         | 0                          | 0                         | 0                          |
| 0    | 0                 | 0                 | 0                        | 0                         | 0                        | 0                         | 0                         | 0                          | 0                         | 0                          |
| 0    | 0                 | 0                 | 0                        | 0                         | 0                        | 0                         | 0                         | 0                          | 0                         | 0                          |
| 0    | 0                 | 0                 | 0                        | 0                         | 0                        | 0                         | 0                         | 0                          | 0                         | 0                          |
| 0    | 0                 | 0                 | 0                        | 0                         | 0                        | 0                         | 0                         | 0                          | 0                         | 0                          |
| 0    | 0                 | 0                 | 0                        | 0                         | 0                        | 0                         | 0                         | 0                          | 0                         | 0                          |
| 0    | 0                 | 0                 | 0                        | 0                         | 0                        | 0                         | 0                         | 0                          | 0                         | 0                          |
| 0    | 0                 | 0                 | 0                        | 0                         | 0                        | 0                         | 0                         | 0                          | 0                         | 0                          |
| 0    | 0                 | 0                 | 0                        | 0                         | 0                        | 0                         | 0                         | 0                          | 0                         | 0                          |
| 0    | 0                 | 0                 | 0                        | 0                         | 0                        | 0                         | 0                         | 0                          | 0                         | 0                          |
| 0    | 0                 | 0                 | 0                        | 0                         | 0                        | 0                         | 0                         | 0                          | 0                         | 0                          |
| 0    | 0                 | 0                 | 0                        | 0                         | 0                        | 0                         | 0                         | 0                          | 0                         | 0                          |
| 0    | 0                 | 0                 | 0                        | 0                         | 0                        | 0                         | 0                         | 0                          | 0                         | 0                          |
| 0    | 0                 | 0                 | 0                        | 0                         | 0                        | 0                         | 0                         | 0                          | 0                         | 0                          |
| 0    | 0                 | 0                 | 0                        | 0                         | 0                        | 0                         | 0                         | 0                          | 0                         | 0                          |
| 0    | 0                 | 0                 | 0                        | 0                         | 0                        | 0                         | 0                         | 0                          | 0                         | 0                          |
| 0    | 0                 | 0                 | 0                        | 0                         | 0                        | 0                         | 0                         | 0                          | 0                         | 0                          |
| 0    | 0                 | 0                 | 0                        | 0                         | 0                        | 0                         | 0                         | 0                          | 0                         | 0                          |
| 0    | 0                 | 0                 | 0                        | 0                         | 0                        | 0                         | 0                         | 0                          | 0                         | 0                          |
| 0    | 0                 | 0                 | 0                        | 0                         | 0                        | 0                         | 0                         | 0                          | 0                         | 0                          |
| 0    | 0                 | 0                 | 0                        | 0                         | 0                        | 0                         | 0                         | 0                          | 0                         | 0                          |
| 0    | 0                 | 0                 | 0                        | 0                         | 0                        | 0                         | 0                         | 0                          | 0                         | 0                          |

|                |       |        |        |       |       |        |       |       |       |        |
|----------------|-------|--------|--------|-------|-------|--------|-------|-------|-------|--------|
| <b>4.84</b>    | 16    | 22.7   | 0      | 0     | 0     | 0      | 0     | 0     | 0     | 0      |
| <b>2.29</b>    | 5.58  | 11     | 0      | 0     | 0     | 0      | 0     | 0     | 0     | 0      |
| <b>1.53</b>    | 0.892 | 3.31   | 0      | 0     | 0     | 0      | 0     | 0     | 0     | 0      |
| <b>1.23</b>    | 0     | 0.472  | 0      | 0     | 0     | 0      | 0     | 0     | 0     | 0      |
| <b>0.856</b>   | 0     | 0      | 0      | 0     | 0     | 0      | 0     | 0     | 0     | 0      |
| <b>0.446</b>   | 0     | 0      | 2.79   | 0     | 0     | 0      | 0     | 0     | 0     | 0      |
| <b>0.152</b>   | 0     | 0.0075 | 10.5   | 0     | 0     | 0      | 0     | 0     | 0     | 0      |
|                | 8     |        |        |       |       |        |       |       |       |        |
| <b>0.0372</b>  | 0     | 0.063  | 17.3   | 4.53  | 0     | 0.958  | 0     | 0     | 0     | 0.958  |
| <b>0.0644</b>  | 0     | 0.182  | 16.3   | 16.8  | 6.7   | 6.25   | 0.938 | 0     | 0     | 6.25   |
| <b>0.151</b>   | 0.009 | 0.291  | 12.2   | 25.1  | 23.3  | 15.2   | 8.68  | 0     | 0     | 15.2   |
|                | 48    |        |        |       |       |        |       |       |       |        |
| <b>0.223</b>   | 0.066 | 0.325  | 6.23   | 19.4  | 30.4  | 20     | 21.5  | 2.94  | 0     | 20     |
|                | 3     |        |        |       |       |        |       |       |       |        |
| <b>0.247</b>   | 0.176 | 0.294  | 2.17   | 8.02  | 17.7  | 16.9   | 23.8  | 14.5  | 1.36  | 16.9   |
| <b>0.222</b>   | 0.261 | 0.233  | 0.398  | 1.44  | 3.93  | 10.2   | 13.5  | 26    | 6.89  | 10.2   |
| <b>0.168</b>   | 0.267 | 0.171  | 0.0956 | 0     | 0     | 4.45   | 3.78  | 21    | 13.9  | 4.45   |
| <b>0.109</b>   | 0.211 | 0.121  | 0.313  | 0     | 0     | 1.26   | 0.326 | 7.48  | 14.9  | 1.26   |
| <b>0.0595</b>  | 0.137 | 0.0859 | 0.492  | 0     | 0     | 0.174  | 0     | 0.876 | 9.47  | 0.174  |
| <b>0.0258</b>  | 0.072 | 0.0628 | 0.472  | 0     | 0     | 0      | 0     | 0     | 3.52  | 0      |
|                | 2     |        |        |       |       |        |       |       |       |        |
| <b>0.00778</b> | 0.029 | 0.0483 | 0.313  | 0     | 0     | 0.0715 | 0     | 0     | 0.595 | 0.0715 |
|                | 8     |        |        |       |       |        |       |       |       |        |
| <b>0.00218</b> | 0.008 | 0.0399 | 0.135  | 0.492 | 0     | 0.36   | 0     | 0     | 0     | 0.36   |
|                | 4     |        |        |       |       |        |       |       |       |        |
| <b>0.00795</b> | 0.001 | 0.0365 | 0.0282 | 0.54  | 0.164 | 0.957  | 0     | 0     | 0     | 0.957  |
|                | 17    |        |        |       |       |        |       |       |       |        |
| <b>0.0282</b>  | 0.001 | 0.0387 | 0      | 0.78  | 1.99  | 1.76   | 0.259 | 0     | 0     | 1.76   |
|                | 19    |        |        |       |       |        |       |       |       |        |
| <b>0.0637</b>  | 0.010 | 0.0458 | 0.17   | 0.48  | 5.6   | 2.41   | 1.88  | 0     | 0     | 2.41   |
|                | 4     |        |        |       |       |        |       |       |       |        |
| <b>0.107</b>   | 0.038 | 0.0536 | 0.906  | 0.72  | 6.43  | 2.58   | 5.36  | 0.458 | 0     | 2.58   |
| <b>0.145</b>   | 0.088 | 0.0591 | 2.46   | 0.35  | 3.2   | 2.23   | 8.26  | 3.19  | 1.15  | 2.23   |
|                | 9     |        |        |       |       |        |       |       |       |        |
| <b>0.167</b>   | 0.157 | 0.0619 | 4.57   | 0.389 | 0.544 | 1.61   | 7.39  | 7.89  | 5.29  | 1.61   |
| <b>0.16</b>    | 0.225 | 0.0617 | 6.44   | 0     | 0     | 1.12   | 3.63  | 9.22  | 11.1  | 1.12   |

|                |         |          |       |   |   |        |      |      |      |        |
|----------------|---------|----------|-------|---|---|--------|------|------|------|--------|
| <b>0.121</b>   | 0.269   | 0.0561   | 7.09  | 0 | 0 | 1.17   | 0.75 | 5.23 | 14.2 | 1.17   |
| <b>0.0622</b>  | 0.228   | 0.0436   | 5.34  | 0 | 0 | 1.44   | 0    | 1.17 | 11.3 | 1.44   |
| <b>0.016</b>   | 0.108   | 0.0252   | 2.11  | 0 | 0 | 1.28   | 0    | 0    | 5.22 | 1.28   |
| <b>4.63E-4</b> | 0.026   | 0.0079   | 0.279 | 0 | 0 | 0.984  | 0    | 0    | 1.04 | 0.984  |
| <b>2</b>       |         |          |       |   |   |        |      |      |      |        |
| <b>0</b>       | 0.005   | 6.36E-75 | 0.015 | 0 | 0 | 0.858  | 0    | 0    | 0    | 0.858  |
| <b>4</b>       |         |          |       |   |   |        |      |      |      |        |
| <b>0</b>       | 6.26E-4 | 0        | 0     | 0 | 0 | 0.732  | 0    | 0    | 0    | 0.732  |
| <b>0</b>       | 0       | 0        | 0     | 0 | 0 | 0.542  | 0    | 0    | 0    | 0.542  |
| <b>0</b>       | 0       | 0        | 0     | 0 | 0 | 0.297  | 0    | 0    | 0    | 0.297  |
| <b>0</b>       | 0       | 0        | 0     | 0 | 0 | 0.0975 | 0    | 0    | 0    | 0.0975 |
| <b>0</b>       | 0       | 0        | 0     | 0 | 0 | 0.0127 | 0    | 0    | 0    | 0.0127 |
| <b>0</b>       | 0       | 0        | 0     | 0 | 0 | 0      | 0    | 0    | 0    | 0      |
| <b>0</b>       | 0       | 0        | 0     | 0 | 0 | 0      | 0    | 0    | 0    | 0      |
| <b>0</b>       | 0       | 0        | 0     | 0 | 0 | 0.0974 | 0    | 0    | 0    | 0.0974 |
| <b>0</b>       | 0       | 0        | 0     | 0 | 0 | 1.11   | 0    | 0    | 0    | 1.11   |
| <b>0</b>       | 0       | 0.0088   | 0     | 0 | 0 | 1.94   | 0    | 0    | 0    | 1.94   |
| <b>3</b>       |         |          |       |   |   |        |      |      |      |        |
| <b>0</b>       | 0       | 0.0177   | 0     | 0 | 0 | 0.92   | 0    | 0    | 0    | 0.92   |
| <b>0</b>       | 0       | 0.0088   | 0     | 0 | 0 | 0      | 0    | 0    | 0    | 0      |
| <b>3</b>       |         |          |       |   |   |        |      |      |      |        |
| <b>0</b>       | 0       | 0        | 0     | 0 | 0 | 0      | 0    | 0    | 0    | 0      |

**Table.4. Changes in PPI surface hydrophobicity**

| H <sub>0</sub> | -20 °C |        |        | 4 °C   |        |        | 37 °C  |        |        | 37 °C AP |        |        |
|----------------|--------|--------|--------|--------|--------|--------|--------|--------|--------|----------|--------|--------|
| 0 wks          | 601.25 | 581.56 | 591.33 | 601.25 | 581.56 | 591.33 | 601.25 | 581.56 | 591.33 | 601.25   | 581.56 | 591.33 |
| 2 wks          | 592.26 | 578.45 | 585.28 | 583.01 | 574.68 | 578.77 | 564.81 | 549.36 | 557.01 | 541.81   | 523.94 | 532.80 |
| 4 wks          | 569.61 | 558.68 | 564.07 | 533.87 | 531.16 | 532.44 | 520.27 | 493.76 | 506.94 | 484.61   | 481.74 | 483.10 |
| 6 wks          | 491.01 | 467.5  | 479.18 | 467.05 | 436.94 | 451.92 | 424.2  | 420.57 | 422.31 | 406.69   | 397.62 | 402.08 |
| 8 wks          | 397.57 | 390.82 | 394.12 | 390.29 | 380.00 | 385.07 | 378.48 | 369.87 | 374.1  | 377.26   | 361.21 | 369.16 |
| 10 wks         | 394.30 | 383.89 | 389.02 | 383.63 | 376.76 | 380.12 | 372.57 | 357.96 | 365.19 | 363.16   | 341.89 | 352.45 |

  

|       | 4 °C 33%RH |        |        | 37 °C 33%RH |        |        | 4 °C 74%RH |        |        | 37 °C 74%RH |        |        |
|-------|------------|--------|--------|-------------|--------|--------|------------|--------|--------|-------------|--------|--------|
| 0 wks | 545.65     | 525.52 | 535.51 | 545.65      | 525.52 | 535.51 | 530.87     | 515.66 | 523.19 | 530.87      | 515.66 | 523.19 |
| 2 wks | 519.16     | 505.69 | 512.35 | 506.02      | 493.97 | 499.92 | 495.56     | 489.07 | 492.24 | 498.55      | 479.22 | 488.81 |
| 4 wks | 483.89     | 466.56 | 475.15 | 472.35      | 468.44 | 470.32 | 421.13     | 410.6  | 415.79 | 372.3       | 360.07 | 366.11 |
| 6 wks | 416.91     | 409.9  | 413.33 | 384.3       | 377.61 | 380.88 | 380.91     | 360.24 | 370.5  | 340.82      | 322.13 | 331.4  |



|        |        |        |        |        |        |        |        |        |        |        |        |        |
|--------|--------|--------|--------|--------|--------|--------|--------|--------|--------|--------|--------|--------|
| 8 wks  | 381.59 | 378.4  | 379.92 | 366.56 | 354.61 | 360.51 | 338.31 | 331.48 | 334.82 | 314.74 | 306.43 | 310.51 |
| 10 wks | 332.39 | 327.98 | 330.11 | 322.62 | 320.05 | 321.26 | 316.17 | 307.56 | 311.79 | 302.88 | 299.75 | 301.24 |

**Table.5. Changes in PPI EAI**

| EAI<br>(m <sup>2</sup> /g) | -20 °C |       |       | 4 °C  |       |       | 37 °C |       |       | 37 °C AP |       |       |
|----------------------------|--------|-------|-------|-------|-------|-------|-------|-------|-------|----------|-------|-------|
| 0 wks                      | 47.78  | 45.75 | 46.69 | 47.78 | 45.75 | 46.69 | 47.78 | 45.75 | 46.69 | 47.78    | 45.75 | 46.69 |
| 2 wks                      | 47     | 44.57 | 45.71 | 45.66 | 44.29 | 44.9  | 39.74 | 38.76 | 39.19 | 37.06    | 36.76 | 36.85 |
| 4 wks                      | 43.8   | 41.68 | 42.65 | 42.56 | 41.61 | 42.01 | 34.95 | 32.34 | 33.57 | 31.48    | 30.36 | 30.83 |
| 6 wks                      | 36.57  | 35.59 | 35.99 | 36.15 | 32.13 | 34.05 | 30.97 | 28.47 | 29.63 | 26.62    | 25.35 | 25.91 |
| 8 wks                      | 30.81  | 28.56 | 29.61 | 30.23 | 27.29 | 28.69 | 26.68 | 24.76 | 25.66 | 23.59    | 22.7  | 23.1  |
| 10 wks                     | 28.14  | 25.98 | 26.97 | 27.28 | 24.88 | 25.99 | 23.55 | 20.97 | 22.18 | 20.62    | 20.38 | 20.41 |

|        | 4 °C 33%RH |       |       | 37 °C 33%RH |       |       | 4 °C 74%RH |       |       | 37 °C 74%RH |       |       |
|--------|------------|-------|-------|-------------|-------|-------|------------|-------|-------|-------------|-------|-------|
| 0 wks  | 50.39      | 49.86 | 50.05 | 50.39       | 49.86 | 50.05 | 47.91      | 46.43 | 47.11 | 47.91       | 46.43 | 47.11 |
| 2 wks  | 48.39      | 46.83 | 47.52 | 47.69       | 45.23 | 46.42 | 45.58      | 44.22 | 44.81 | 40.98       | 37.87 | 39.35 |
| 4 wks  | 43.16      | 41.83 | 42.45 | 42.36       | 41.66 | 41.92 | 40.9       | 38.24 | 39.51 | 36.14       | 35.09 | 35.57 |
| 6 wks  | 37.61      | 35.83 | 36.66 | 35.1        | 34.23 | 34.59 | 34.85      | 33.31 | 34.02 | 33.25       | 32.33 | 32.73 |
| 8 wks  | 32.82      | 31.58 | 32.11 | 31.16       | 30.92 | 30.98 | 30.91      | 29.93 | 30.36 | 28.99       | 27.87 | 28.34 |
| 10 wks | 31.46      | 28.85 | 30.08 | 29.32       | 28.85 | 29.01 | 27.56      | 26.23 | 26.82 | 24.3        | 22.59 | 23.4  |

**Table.6. Changes in PPI ESI**

| ESI<br>(min)  | -20 °C |       |       | 4 °C  |       |       | 37 °C |       |       | 37 °C AP |       |       |
|---------------|--------|-------|-------|-------|-------|-------|-------|-------|-------|----------|-------|-------|
| <b>0 wks</b>  | 25     | 24.64 | 24.76 | 25    | 24.64 | 24.76 | 25    | 24.64 | 24.76 | 25       | 24.64 | 24.76 |
| <b>2 wks</b>  | 24.79  | 24.12 | 24.38 | 23.58 | 22.64 | 23.05 | 22.68 | 21.99 | 22.29 | 20.33    | 19.83 | 20.02 |
| <b>4 wks</b>  | 24.22  | 23.2  | 23.62 | 22.67 | 21.63 | 22.09 | 20.42 | 18.9  | 19.57 | 17.88    | 17.03 | 17.41 |
| <b>6 wks</b>  | 17.39  | 16.64 | 16.94 | 16.11 | 15.29 | 15.61 | 14.81 | 13.76 | 14.21 | 13.35    | 12.73 | 12.95 |
| <b>8 wks</b>  | 16.18  | 15.56 | 15.81 | 15.59 | 14.88 | 15.16 | 14.05 | 13.39 | 13.63 | 12.33    | 11.95 | 12.07 |
| <b>10 wks</b> | 15.65  | 14.81 | 15.14 | 14.03 | 12.57 | 13.21 | 12.64 | 11.75 | 12.11 | 12.13    | 10.97 | 11.49 |

|              | 4 °C 33%RH |       |       | 37 °C 33%RH |       |       | 4 °C 74%RH |       |       | 37 °C 74%RH |       |       |
|--------------|------------|-------|-------|-------------|-------|-------|------------|-------|-------|-------------|-------|-------|
| <b>0 wks</b> | 20.28      | 19.95 | 20.04 | 20.28       | 19.95 | 20.04 | 20.04      | 19.78 | 19.82 | 20.04       | 19.78 | 19.82 |
| <b>2 wks</b> | 19.91      | 19.69 | 19.71 | 19.12       | 18.7  | 18.85 | 18.58      | 18.39 | 18.44 | 17.96       | 17.74 | 17.79 |
| <b>4 wks</b> | 18.07      | 17.85 | 17.9  | 16.54       | 16.35 | 16.37 | 15.89      | 15.6  | 15.67 | 15.25       | 15.00 | 15.05 |
| <b>6 wks</b> | 16.32      | 15.94 | 16.07 | 16.04       | 15.76 | 15.81 | 15.27      | 14.89 | 15.02 | 13.99       | 13.83 | 13.82 |
| <b>8 wks</b> | 15.13      | 14.84 | 14.91 | 13.3        | 13.09 | 13.15 | 12.26      | 11.94 | 12.05 | 11.23       | 10.91 | 11.01 |
| <b>10wks</b> | 13.43      | 13.2  | 13.27 | 11.65       | 11.45 | 11.49 | 11.11      | 10.71 | 10.84 | 10.31       | 9.96  | 10.09 |

**Table.7. Changes in PPI secondary structures ( $\alpha$ -helix and  $\beta$ -sheet)**

|                       | $\alpha$ -helix (%) |       |       | $\beta$ -sheet (%) |       |       |
|-----------------------|---------------------|-------|-------|--------------------|-------|-------|
| <b>0 wks</b>          | 14.79               | 14.71 | 14.78 | 36.73              | 36.71 | 36.84 |
| <b>6wks -20°C</b>     | 14.64               | 14.51 | 14.59 | 36.49              | 36.41 | 36.33 |
| <b>6 wks 4°C</b>      | 14.53               | 14.36 | 14.4  | 36.17              | 36.09 | 36.07 |
| <b>6 wks 37°C</b>     | 14.31               | 14.42 | 14.44 | 35.99              | 35.95 | 35.91 |
| <b>6 wks 37°CAP</b>   | 14.29               | 14.23 | 14.2  | 35.65              | 35.63 | 35.58 |
| <b>10wks-20°C</b>     | 14.41               | 14.31 | 14.33 | 35.69              | 35.58 | 35.53 |
| <b>10wks -4°C</b>     | 14.39               | 14.28 | 14.26 | 35.58              | 35.48 | 35.47 |
| <b>10wks 37°C</b>     | 14.32               | 14.28 | 14.27 | 35.35              | 35.3  | 35.28 |
| <b>10wks37°CAP</b>    | 14.26               | 14.12 | 14.16 | 35.2               | 35.14 | 35.17 |
|                       | $\alpha$ -helix (%) |       |       | $\beta$ -sheet (%) |       |       |
| <b>0wks 33%RH</b>     | 14.78               | 14.62 | 14.67 | 36.7               | 36.57 | 36.53 |
| <b>0wks 74%RH</b>     | 14.7                | 14.51 | 14.56 | 36.6               | 36.48 | 36.45 |
| <b>6wks4°C33% RH</b>  | 14.55               | 14.42 | 14.47 | 36.12              | 35.99 | 35.98 |
| <b>6wks37°C33%RH</b>  | 14.44               | 14.29 | 14.32 | 35.79              | 35.72 | 35.71 |
| <b>6wks4°C74% RH</b>  | 14.35               | 14.28 | 14.27 | 35.56              | 35.4  | 35.45 |
| <b>6wks37°C74%RH</b>  | 14.3                | 14.11 | 14.16 | 35.36              | 35.23 | 35.19 |
| <b>10wks4°C33%</b>    | 14.39               | 14.3  | 14.3  | 35.4               | 35.32 | 35.33 |
| <b>10wks37°C33%RH</b> | 14.36               | 14.21 | 14.24 | 35.24              | 35.18 | 35.15 |
| <b>10wks4°C74% RH</b> | 14.24               | 14.13 | 14.11 | 35.02              | 34.93 | 34.93 |
| <b>10wks37°C74%RH</b> | 14.13               | 14.07 | 14.1  | 34.56              | 34.4  | 34.45 |

**Table.8. Changes in PPI secondary structures ( $\beta$ -turn and Random coil)**

|                   | $\beta$ -turn (%) |       |       | Random coil (%) |       |       |
|-------------------|-------------------|-------|-------|-----------------|-------|-------|
| <b>0 wks</b>      | 34.2              | 34.31 | 34.18 | 14.28           | 14.27 | 14.2  |
| <b>6wks -20°C</b> | 34.59             | 34.74 | 34.77 | 14.28           | 14.34 | 14.31 |
| <b>6 wks 4°C</b>  | 34.91             | 35.04 | 35.08 | 14.39           | 14.51 | 14.45 |
| <b>6 wks 37°C</b> | 35.21             | 35.15 | 35.12 | 14.49           | 14.48 | 14.53 |

|                    |       |       |       |       |       |       |
|--------------------|-------|-------|-------|-------|-------|-------|
| <b>6wks37°CAP</b>  | 35.39 | 35.44 | 35.46 | 14.67 | 14.7  | 14.76 |
| <b>10wks-20°C</b>  | 35.28 | 35.41 | 35.42 | 14.62 | 14.7  | 14.72 |
| <b>10wks -4°C</b>  | 35.3  | 35.45 | 35.48 | 14.73 | 14.79 | 14.79 |
| <b>10wks 37°C</b>  | 35.49 | 35.62 | 35.63 | 14.84 | 14.8  | 14.82 |
| <b>10wks37°CAP</b> | 35.72 | 35.85 | 35.83 | 14.82 | 14.89 | 14.84 |

  

|                        | <b>β-turn (%)</b> |       |       | <b>Random coil (%)</b> |       |       |
|------------------------|-------------------|-------|-------|------------------------|-------|-------|
| <b>0wks 33%RH</b>      | 34.31             | 34.45 | 34.47 | 14.21                  | 14.36 | 14.33 |
| <b>0wks 74%RH</b>      | 34.46             | 34.6  | 34.59 | 14.24                  | 14.41 | 14.4  |
| <b>6wks4°C 33% RH</b>  | 35.02             | 35.15 | 35.22 | 14.31                  | 14.44 | 14.33 |
| <b>6wks37°C33%RH</b>   | 35.43             | 35.54 | 35.53 | 14.34                  | 14.45 | 14.44 |
| <b>6wks4°C 74% RH</b>  | 35.67             | 35.8  | 35.75 | 14.42                  | 14.52 | 14.53 |
| <b>6wks37°C74%RH</b>   | 35.89             | 36.04 | 36.01 | 14.45                  | 14.62 | 14.64 |
| <b>10wks4°C 3%RH</b>   | 35.76             | 35.85 | 35.88 | 14.45                  | 14.53 | 14.49 |
| <b>10wks37°C33%RH</b>  | 35.96             | 36.04 | 36.06 | 14.44                  | 14.57 | 14.55 |
| <b>10wks4°C 74% RH</b> | 36.23             | 36.39 | 36.37 | 14.51                  | 14.55 | 14.59 |
| <b>10wks37°C74%RH</b>  | 36.66             | 36.76 | 36.8  | 14.65                  | 14.77 | 14.65 |
